# Supplementary material for: Controlling chlorination versus cyclosulfonation of cis-diols using ionic liquid solvents
Source: Royal Society of Chemistry journal article supplement (doi:10.1039/c2nj40180k), 2012-01-01

## Supplementary Information

# Controlling chlorination versus cyclosulfonation of cis-diols using ionic liquid solvents

Christopher Hardacre,<sup>a</sup> Marie E Migaud<sup>b</sup> and Kerry Anne Ness<sup>b</sup>

<sup>a</sup> School of Chemistry and Chemical Engineering, David Keir Building, Stranmillis Road, Queen's University, Belfast, BT9 5AG, UK. Fax: 44 28 9097 4687; Tel: 44 2890 974592; E-mail: c.hardacre@qub.ac.uk

<sup>b</sup> School of Pharmacy, 97 Lisburn Road, Queen's University, Belfast, BT9 7BL, UK. Fax: 44 289024 7794; Tel: 44 2890 972689; E-mail: m.migaud@qub.ac.uk

Figure S1 <sup>1</sup>H [C<sub>4</sub>mpyrr][BF<sub>4</sub>] ionic liquid

kh101-c4mpyrrbf4

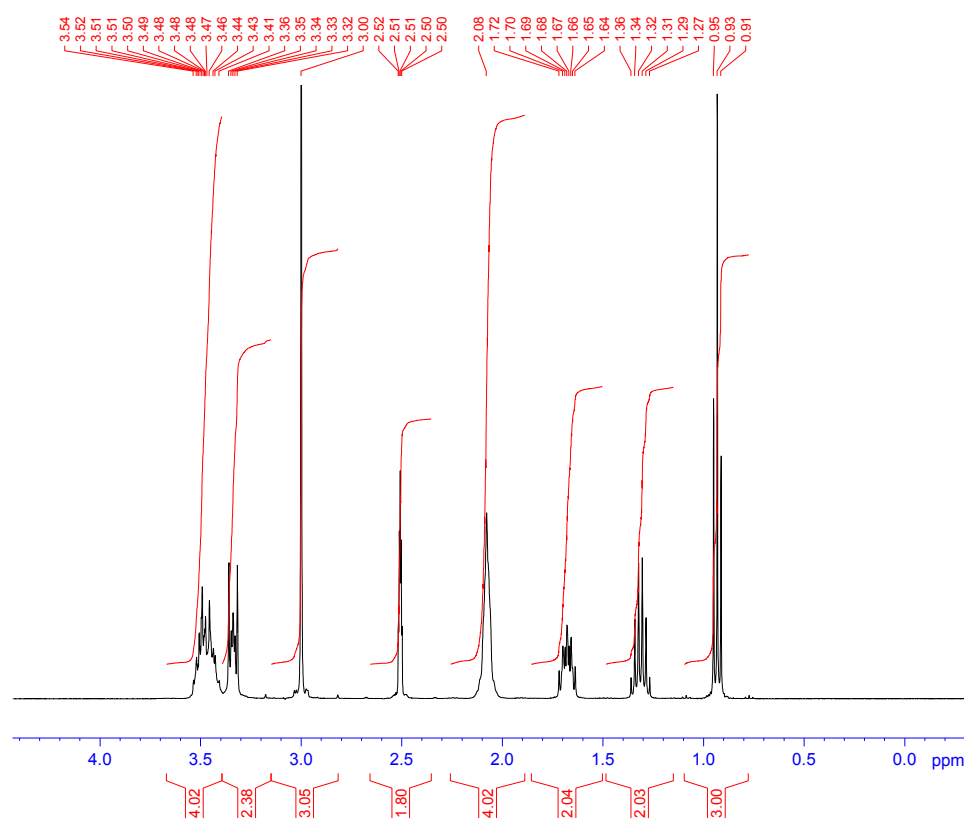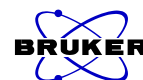

```
NAME kh101-c4mpyrrbf4
EXPNO 10
PROCNO 1
Date_ 20120417
Time 15.47
INSTRUM spect
PROBHD 5 mm PABBO BB-
PULPROG zg30
TD 65536
SOLVENT DMSO
NS 16
DS 0
SWH 8223.685 Hz
FIDRES 0.125483 Hz
AQ 3.9846387 sec
RG 64
DW 60.800 usec
DE 16.92 usec
TE 300.0 K
D1 1.0000000 sec
TD0 1

===== CHANNEL f1 =====
NUC1 1H
P1 9.80 usec
PL1 -4.00 dB
PL1W 24.60733604 W
SFO1 400.1324710 MHz
SI 32768
SF 400.1300000 MHz
WDW EM
SSB 0
LB 0.30 Hz
GB 0
PC 1.40
```

S2  $^{13}\text{C}$  [C<sub>4</sub>mpyrr][BF<sub>4</sub>] ionic liquid

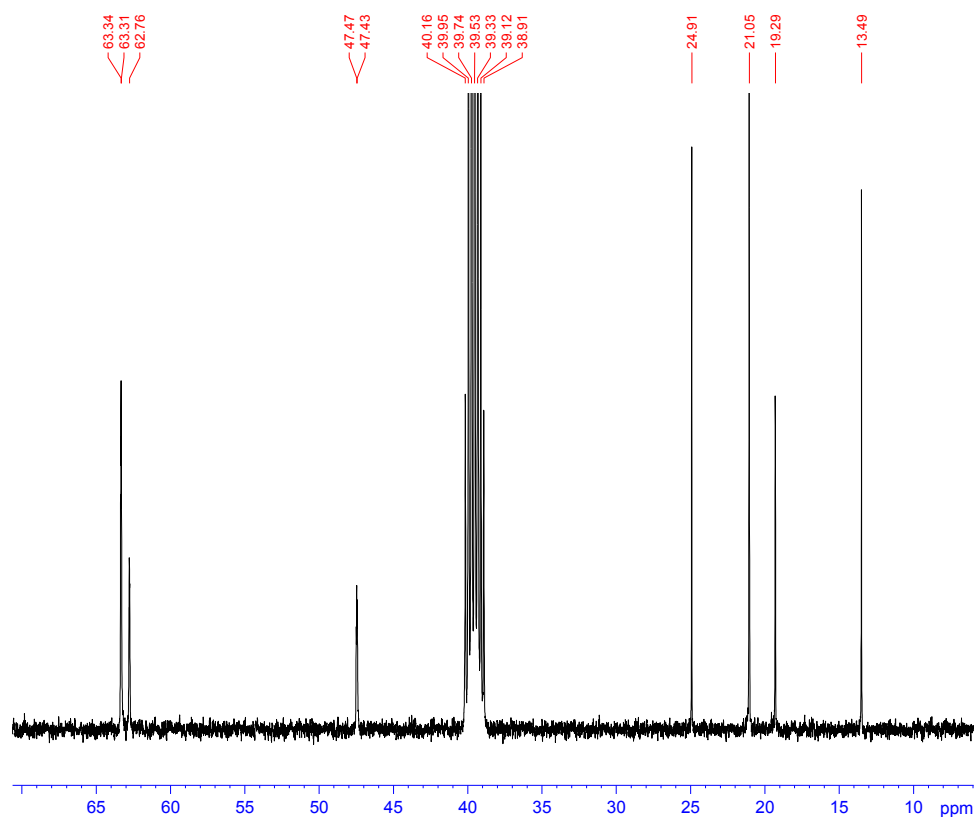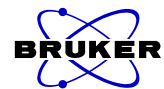

NAME kh101-c4mpyrrbf4  
EXPNO 11  
PROCNO 1  
Date\_ 20120417  
Time 19.35  
INSTRUM spect  
PROBHD 5 mm PABBO BB-  
PULPROG zgpg30  
TD 65536  
SOLVENT DMSO  
NS 512  
DS 4  
SWH 24038.461 Hz  
FIDRES 0.366798 Hz  
AQ 1.3631988 sec  
RG 2050  
DW 20.800 usec  
DE 10.04 usec  
TE 300.0 K  
D1 2.00000000 sec  
D11 0.03000000 sec  
TD0 1

===== CHANNEL f1 =====  
NUC1 13C  
P1 7.80 usec  
PL1 -3.00 dB  
PL1W 82.86334091 W  
SFO1 100.6228298 MHz

===== CHANNEL f2 =====  
CPDPRG2 waltz16  
NUC2 1H  
PCPD2 80.00 usec  
PL2 -4.00 dB  
PL12 14.24 dB  
PL13 14.24 dB  
PL2W 24.60733604 W  
PL12W 0.36903250 W  
PL13W 0.36903250 W  
SFO2 400.1316005 MHz  
SI 65536  
SF 100.6128193 MHz  
WDW EM  
SSB 0  
LB 1.00 Hz  
GB 0  
PC 1.40

### S3 <sup>1</sup>H [C<sub>4</sub>mpyrr][Cl] ionic liquid

kh101-c4mpyrrCl

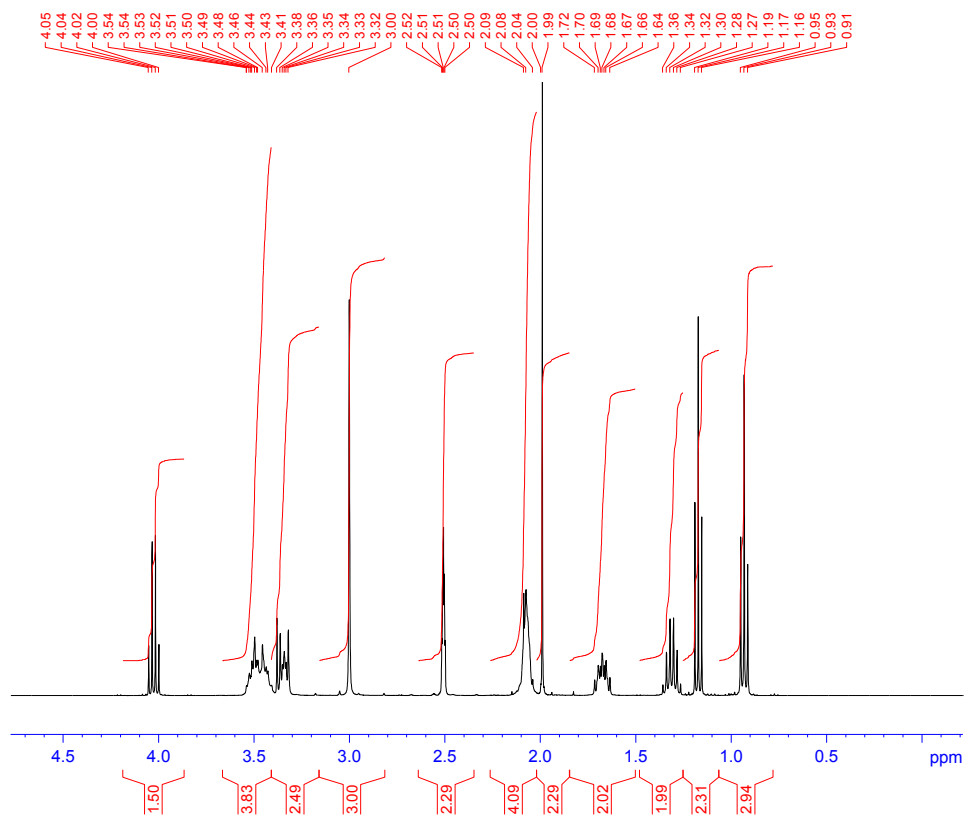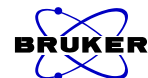

```
NAME kh101-c4mpyrrCl
EXPNO 20
PROCNO 1
Date_ 20120420
Time 16.16
INSTRUM spect
PROBHD 5 mm PABBO BB-
PULPROG zg30
TD 65536
SOLVENT DMSO
NS 16
DS 0
SWH 8223.685 Hz
FIDRES 0.125483 Hz
AQ 3.9846387 sec
RG 64
DW 60.800 usec
DE 16.92 usec
TE 300.0 K
D1 1.00000000 sec
TDO 1

===== CHANNEL f1 =====
NUC1 1H
P1 9.80 usec
PL1 -4.00 dB
PL1W 24.60733604 W
SFO1 400.1324710 MHz
SI 32768
SF 400.1300000 MHz
WDW EM
SSB 0
LB 0.30 Hz
GB 0
PC 1.40
```

### S4 <sup>13</sup>C [C<sub>4</sub>mpyrr][Cl] ionic liquid

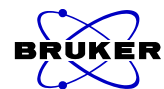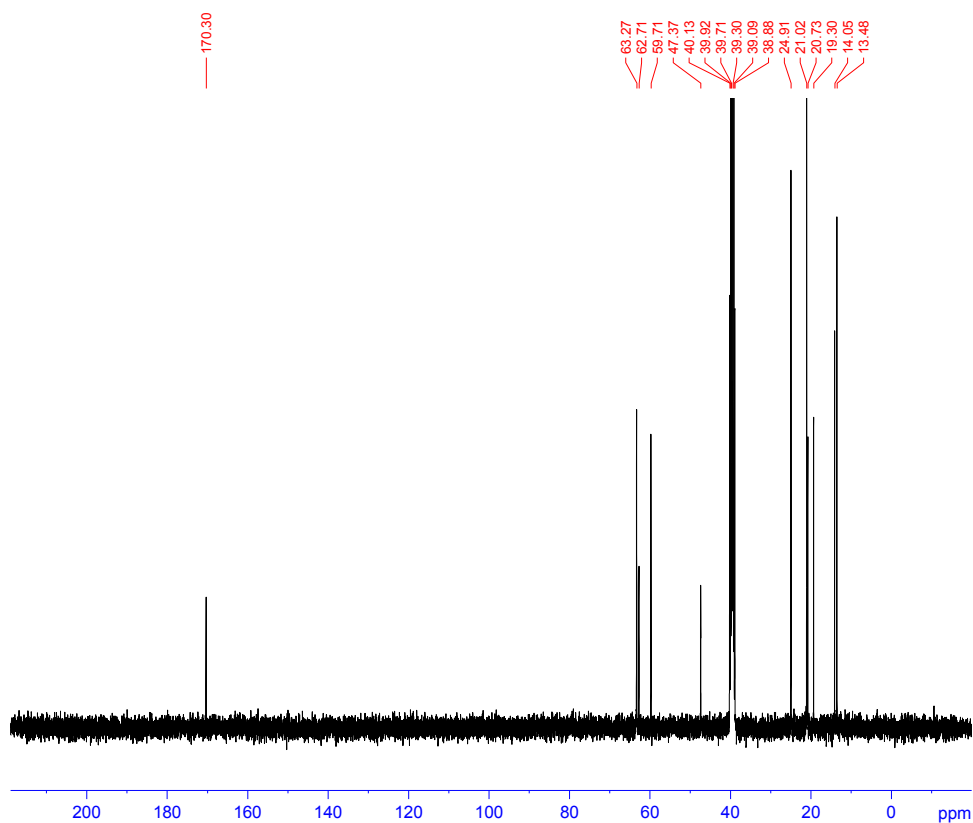

```
NAME kh101-c4mpyrriCl
EXPNO 21
PROCNO 1
Date_ 20120421
Time 11.09
INSTRUM spect
PROBHD 5 mm PABBO BB-
PULPROG zgpg30
TD 65536
SOLVENT DMSO
NS 4
DS 512
SWH 24038.461 Hz
FIDRES 0.366798 Hz
AQ 1.3631988 sec
RG 2050
DW 20.800 usec
DE 10.04 usec
TE 300.0 K
D1 2.0000000 sec
D11 0.0300000 sec
TD0 1

===== CHANNEL f1 =====
NUC1 13C
P1 7.80 usec
PL1 -3.60 dB
PL1W 82.86334991 W
SFO1 100.6228298 MHz

===== CHANNEL f2 =====
CPDPRG2 waltz16
NUC2 1H
PCPD2 80.00 usec
PL2 -4.00 dB
PL12 14.24 dB
PL13 14.24 dB
PL2W 24.60733604 W
PL12W 0.36903250 W
PL13W 0.36903250 W
SFO2 400.1316005 MHz
SI 65536
SF 100.6128193 MHz
WDW EM
SSB 0
LB 1.00 Hz
GB 0
PC 1.40
```

### S5 <sup>1</sup>H [C<sub>4</sub>mpyrr][FAP] ionic liquid

KH101-c4mpyrrFAP

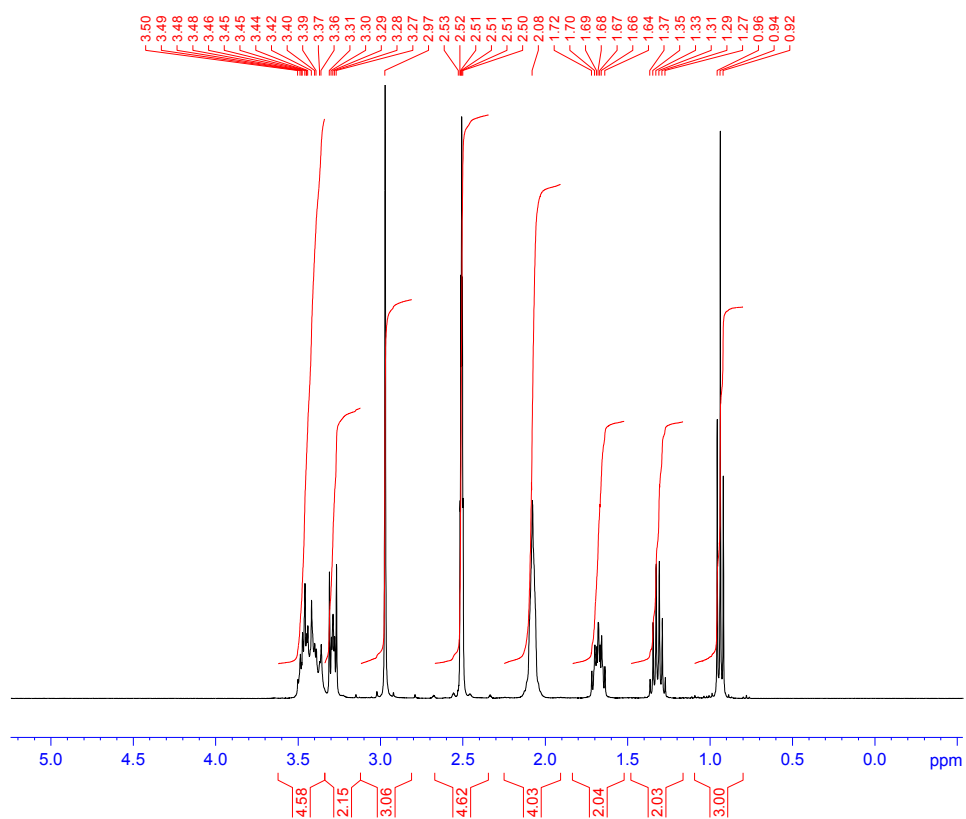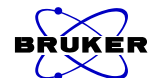

```
NAME kh101-c4mpyrrFAP
EXPNO 10
PROCNO 1
Date_ 20120416
Time 19.54
INSTRUM spect
PROBHD 5 mm PABBO BB-
PULPROG zg30
TD 65536
SOLVENT DMSO
NS 16
DS 0
SWH 8223.685 Hz
FIDRES 0.125483 Hz
AQ 3.9846387 sec
RG 128
DW 60.800 usec
DE 16.92 usec
TE 300.0 K
D1 1.00000000 sec
TD0 1

===== CHANNEL f1 =====
NUC1 1H
P1 9.80 usec
PL1 -4.00 dB
PL1W 24.60733604 W
SFO1 400.1324710 MHz
SI 32768
SF 400.1300000 MHz
WDW EM
SSB 0
LB 0.30 Hz
GB 0
PC 1.40
```

S6  $^{13}\text{C}$  [C<sub>4</sub>mpyrr][FAP] ionic liquid

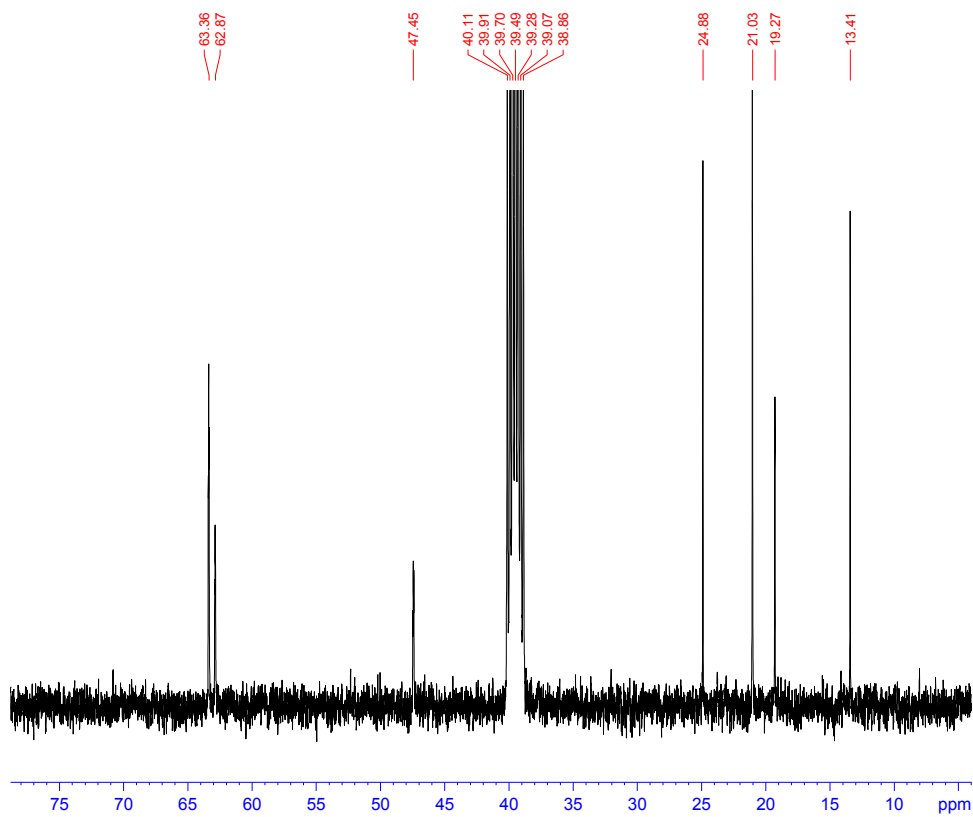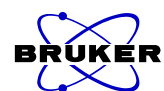

NAME kh101-c4mpyrrFAP  
EXPNO 11  
PROCNO 1  
Date\_ 20120416  
Time\_ 20.25  
INSTRUM spect  
PROBHD 5 mm PABBO BB-  
PULPROG zgpg30  
TD 65536  
SOLVENT DMSO  
NS 512  
DS 4  
SWH 24038.461 Hz  
FIDRES 0.366798 Hz  
AQ 1.3631988 sec  
RG 2050  
DW 20.800 usec  
DE 10.04 usec  
TE 300.0 K  
D1 2.0000000 sec  
D11 0.03000000 sec  
TD0 1

===== CHANNEL f1 =====  
NUC1  $^{13}\text{C}$   
P1 7.80 usec  
PL1 -3.60 dB  
PL1W 82.86334991 W  
SFO1 100.6228298 MHz

===== CHANNEL f2 =====  
CPDPRG2 waltz16  
NUC2  $^1\text{H}$   
PCPD2 80.00 usec  
PL2 -4.00 dB  
PL12 14.24 dB  
PL13 14.24 dB  
PL2W 24.60733604 W  
PL12W 0.36903250 W  
PL13W 0.36903250 W  
SFO2 400.1316005 MHz  
SI 65536  
SF 100.6128193 MHz  
WDW EM  
SSB 0  
LB 1.00 Hz  
GB 0  
PC 1.40

### S7 <sup>1</sup>H [C<sub>4</sub>mpyrr][NTf<sub>2</sub>] ionic liquid

kh101-c4mpyrrmf2

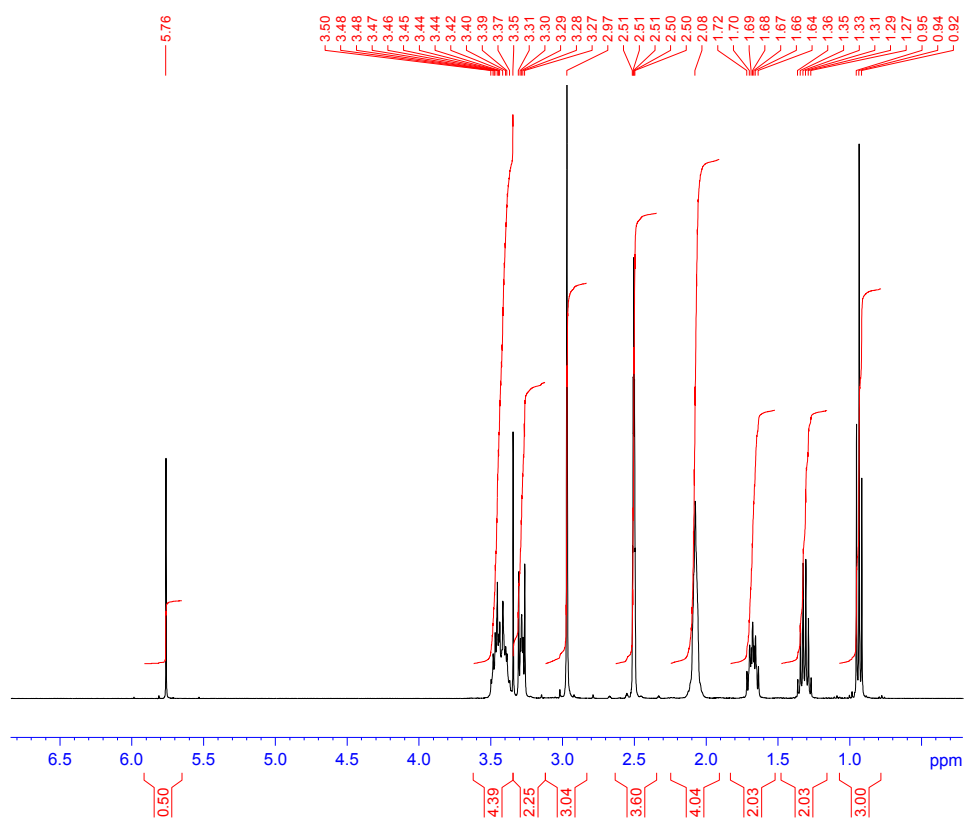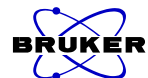

```
NAME kh101-C4mpyrrmf2
EXPNO 20
PROCNO 1
Date_ 20120416
Time 15.27
INSTRUM spect
PROBHD 5 mm PABBO BB-
PULPROG zg30
TD 65536
SOLVENT DMSO
NS 16
DS 0
SWH 8223.685 Hz
FIDRES 0.125483 Hz
AQ 3.9846387 sec
RG 114
DW 60.800 usec
DE 16.92 usec
TE 300.0 K
D1 1.00000000 sec
TDO 1

===== CHANNEL f1 =====
NUC1 1H
P1 9.80 usec
PL1 -4.00 dB
PL1W 24.60733604 W
SFO1 400.1324710 MHz
SI 32768
SF 400.1300000 MHz
WDW EM
SSB 0
LB 0.30 Hz
GB 0
PC 1.40
```

S8 <sup>13</sup>C [C<sub>4</sub>mpyrr][NTf<sub>2</sub>] ionic liquid

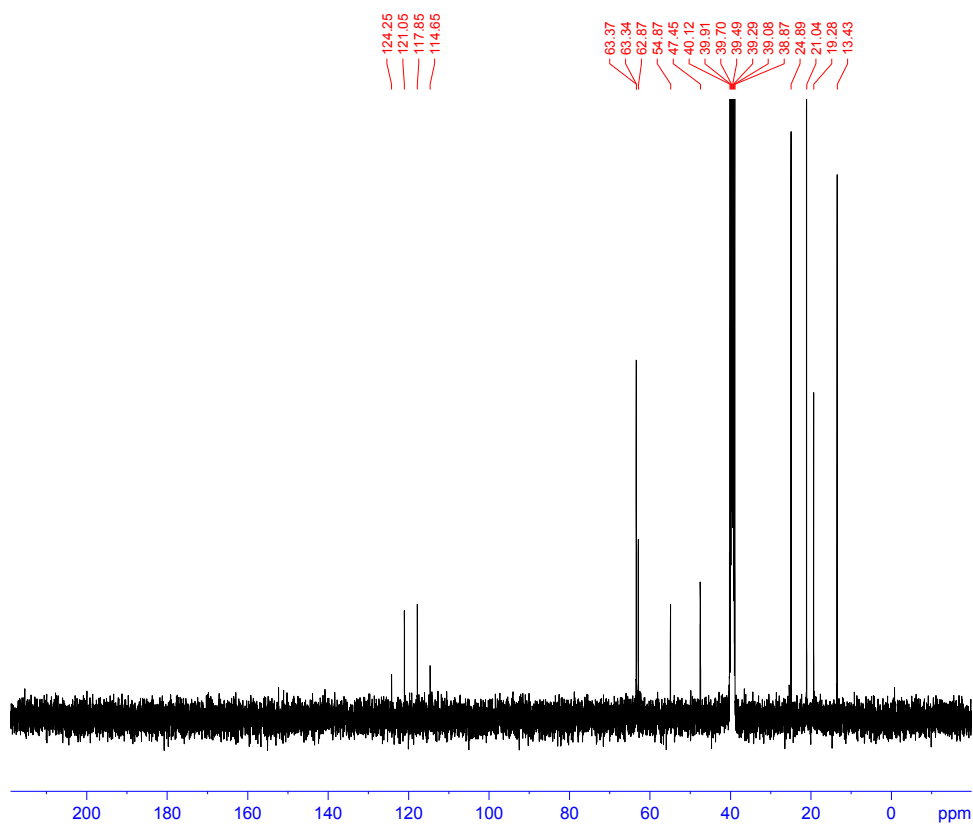

NAME kh101-C4mpyrrntf2  
EXPNO 21  
PROCNO 1  
Date\_ 20120416  
Time\_ 21.25  
INSTRUM spect  
PROBHD 5 mm PABBO BB-  
PULPROG zgpg30  
TD 65536  
SOLVENT DMSO  
NS 512  
DS 4  
SWH 24038.461 Hz  
FIDRES 0.366798 Hz  
AQ 1.3631988 sec  
RG 2050  
DW 20.800 usec  
DE 10.04 usec  
TE 300.0 K  
D1 2.00000000 sec  
D11 0.03000000 sec  
TD0 1

===== CHANNEL f1 =====  
NUC1 13C  
P1 7.80 usec  
PL1 -3.60 dB  
PL1W 82.86334991 W  
SFO1 100.6228298 MHz

===== CHANNEL f2 =====  
CPDPRG2 waltz16  
NUC2 1H  
PCPD2 80.00 usec  
PL2 -4.00 dB  
PL12 14.24 dB  
PL13 14.24 dB  
PL2W 24.60733604 W  
PL12W 0.36903250 W  
PL13W 0.36903250 W  
SFO2 400.1316005 MHz  
SI 65536  
SF 100.6128193 MHz  
WDW EM  
SSB 0  
LB 1.00 Hz  
GB 0  
PC 1.40



# S9 <sup>1</sup>H [C<sub>4</sub>mpyrr][OTf] ionic liquid

kh101-c4mpyrrOTf

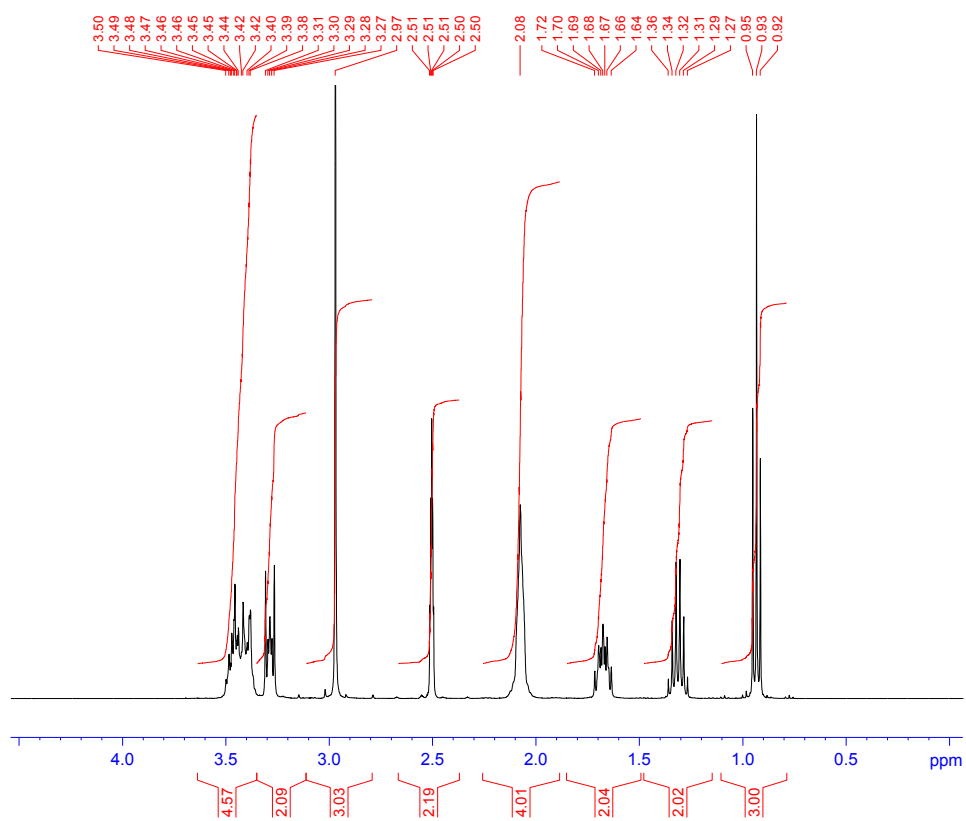

```
NAME kh101-c4mpyrrOTf
EXPNO 10
PROCNO 1
Date_ 20120416
Time 18.43
INSTRUM spect
PROBHD 5 mm PABBO BB-
PULPROG zg30
TD 65536
SOLVENT DMSO
NS 16
DS 0
SWH 8223.685 Hz
FIDRES 0.125483 Hz
AQ 3.9846387 sec
RG 80.6
DW 60.800 usec
DE 16.92 usec
TE 300.0 K
D1 1.00000000 sec
TD0 1

===== CHANNEL f1 =====
NUC1 1H
P1 9.80 usec
PL1 -4.00 dB
PL1W 24.60733604 W
SFO1 400.1324710 MHz
SI 32768
SF 400.1300000 MHz
WDW EM
SSB 0
LB 0.30 Hz
GB 0
PC 1.40
```

S10  $^{13}\text{C}[\text{C}_4\text{mpyrr}][\text{OTf}]$  ionic liquid

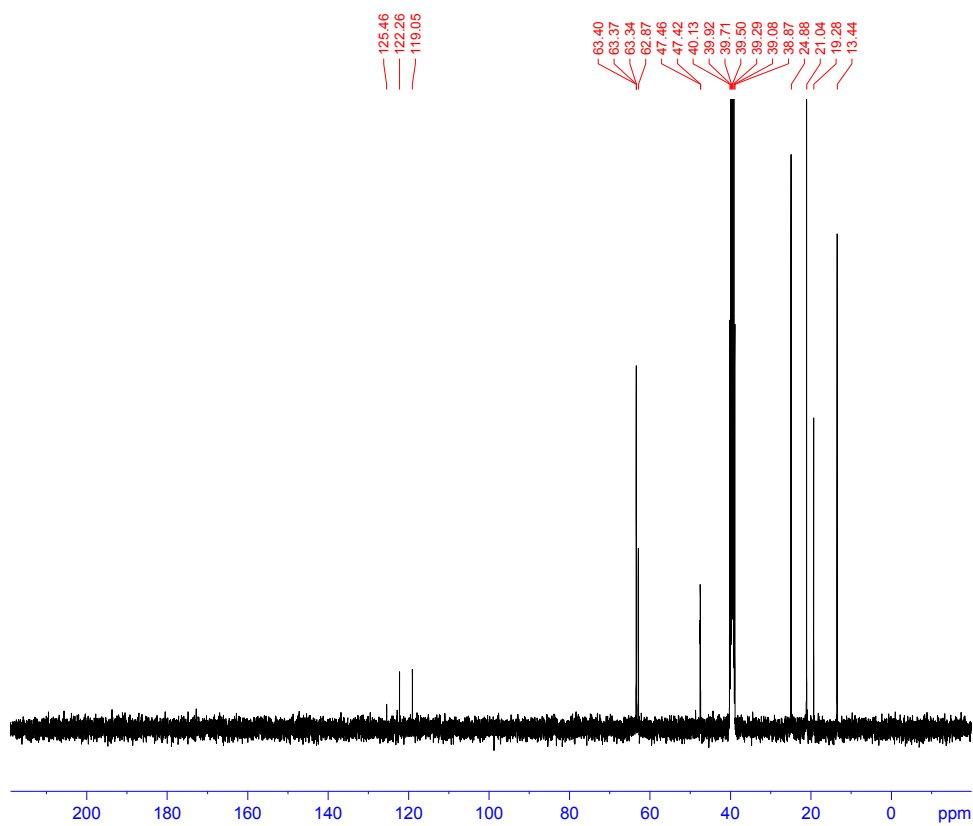

NAME kh101-c4mpyrrOTf  
EXPNO 11  
PROCNO 1  
Date\_ 20120416  
Time\_ 19.42  
INSTRUM spect  
PROBHD 5 mm PABBO BB-  
PULPROG zgpg30  
TD 65536  
SOLVENT DMSO  
NS 512  
DS 4  
SWH 24038.461 Hz  
FIDRES 0.366798 Hz  
AQ 1.3631988 sec  
RG 2050  
DW 20.800 usec  
DE 10.04 usec  
TE 300.0 K  
D1 2.00000000 sec  
D11 0.03000000 sec  
TD0 1

===== CHANNEL f1 =====  
NUC1  $^{13}\text{C}$   
P1 7.80 usec  
PL1 -3.60 dB  
PL1W 82.86334991 W  
SFO1 100.6228298 MHz

===== CHANNEL f2 =====  
CPDPRG2 waltz16  
NUC2  $^1\text{H}$   
PCPD2 80.00 usec  
PL2 -4.00 dB  
PL12 14.24 dB  
PL13 14.24 dB  
PL2W 24.60733604 W  
PL12W 0.36903250 W  
PL13W 0.36903250 W  
SFO2 400.1315005 MHz  
SI 65536  
SF 100.6128193 MHz  
WDW EM  
SSB 0  
LB 1.00 Hz  
GB 0  
PC 1.40

### S11 $^1\text{H}$ of $[\text{C}_4\text{mpyr}][\text{FAP}]$ following reaction and extraction of products

kh101-c4mpyrFAP after reaction

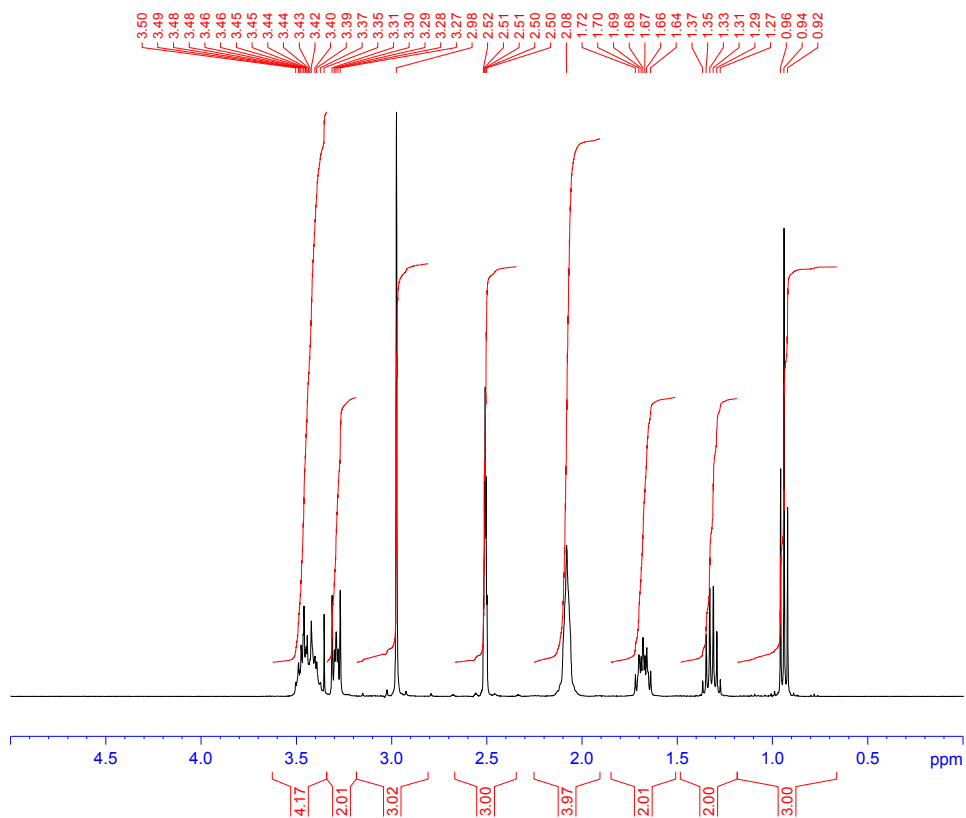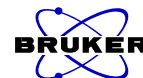

```
NAME kh101-c4mpyrFAP after reaction
EXPNO 20
PROCNO 1
Date_ 20120503
Time 16.54
INSTRUM spect
PROBHD 5 mm PABBO BB-
PULPROG zg30
TD 65536
SOLVENT DMSO
NS 16
DS 0
SWH 8223.685 Hz
FIDRES 0.125483 Hz
AQ 3.9846387 sec
RG 101
DW 60.800 usec
DE 16.92 usec
TE 300.0 K
D1 1.0000000 sec
TD0 1

===== CHANNEL f1 =====
NUC1 1H
P1 9.80 usec
PL1 -4.00 dB
PL1W 24.60733604 W
SFO1 400.1324710 MHz
SI 32768
SF 400.1300000 MHz
WDW EM
SSB 0
LB 0.30 Hz
GB 0
PC 1.40
```

### S12 $^1\text{H}$ of $[\text{C}_4\text{mpyr}][\text{NTf}_2]$ following reaction and extraction of products

kh101-c4mpyrntf2 after reaction

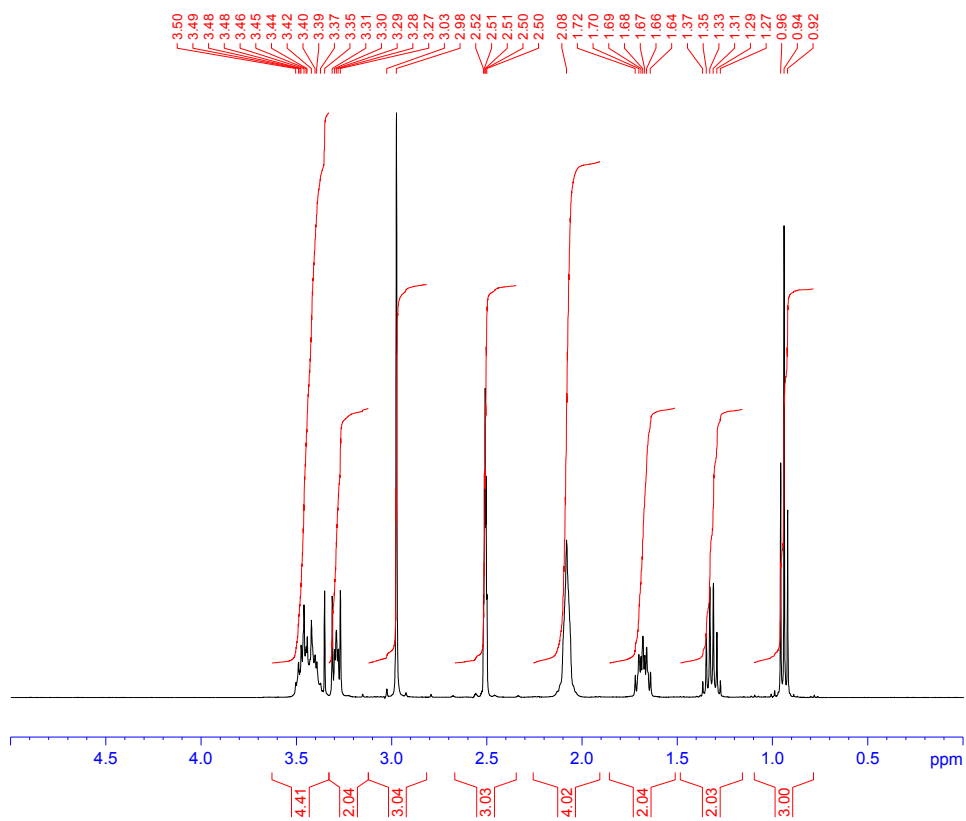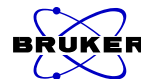

```
NAME kh101-c4mpyrntf2 after reaction
EXPNO 20
PROCNO 1
Date_ 20120503
Time 16.49
INSTRUM spect
PROBHD 5 mm PABBO BB-
PULPROG zg30
TD 65536
SOLVENT DMSO
NS 16
DS 0
SWH 8223.885 Hz
FIDRES 0.125483 Hz
AQ 3.9846387 sec
RG 90.5
DW 60.800 usec
DE 16.32 usec
TE 300.0 K
D1 1.0000000 sec
TDD 1

===== CHANNEL f1 =====
NUC1 1H
P1 9.80 usec
PL1 -4.00 dB
PL1W 24.60733604 W
SFO1 400.1324710 MHz
SI 32768
SF 400.1300000 MHz
WDW EM
SSB 0
LB 0.30 Hz
GB 0
PC 1.40
```

### S13 $^1\text{H}$ of ethylene glycol-d<sub>2</sub>

kh101-ethandiol

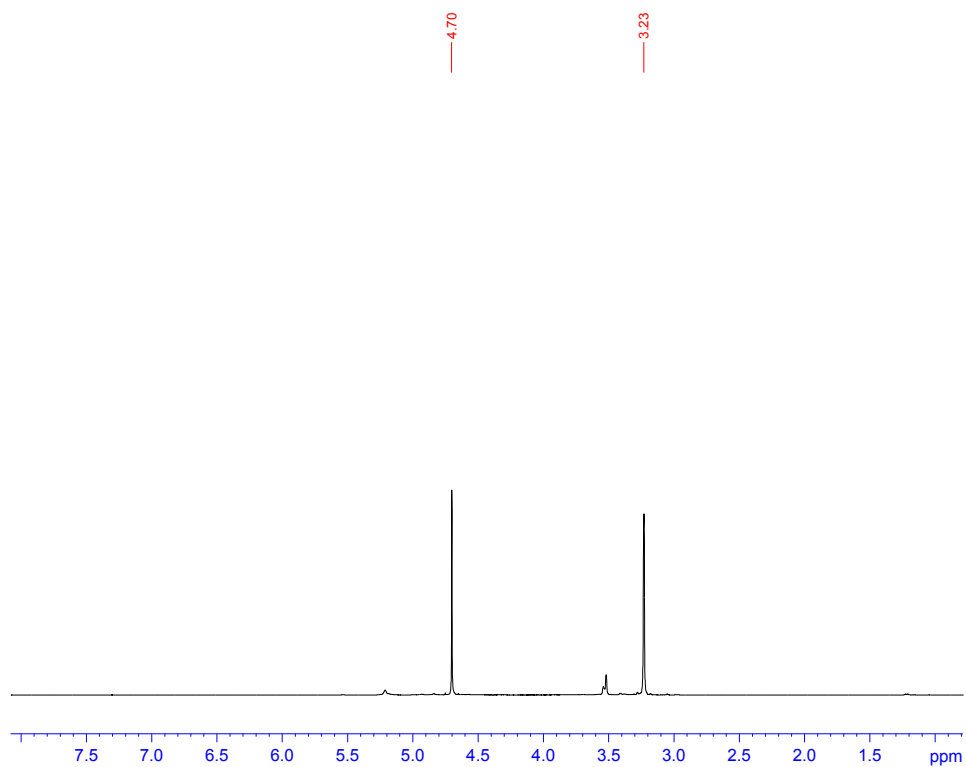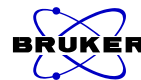

NAME kh101-ethanediol  
EXPNO 10  
PROCNO 1  
Date\_ 20120417  
Time 15.27  
INSTRUM spect  
PROBHD 5 mm PABBO BB-  
PULPROG zg30  
TD 65536  
SOLVENT D2O  
NS 16  
DS 0  
SWH 8223.685 Hz  
FIDRES 0.125483 Hz  
AQ 3.9846387 sec  
RG 101  
DW 60.800 usec  
DE 16.92 usec  
TE 300.0 K  
D1 1.00000000 sec  
TD0 1

===== CHANNEL f1 =====  
NUC1 1H  
P1 9.80 usec  
PL1 -4.00 dB  
PL1W 24.60733604 W  
SFO1 400.1324710 MHz  
SI 32768  
SF 400.1300000 MHz  
WDW EM  
SSB 0  
LB 0.30 Hz  
GB 0  
PC 1.40

S14  $^{13}\text{C}$  of ethylene glycol-d<sub>2</sub>

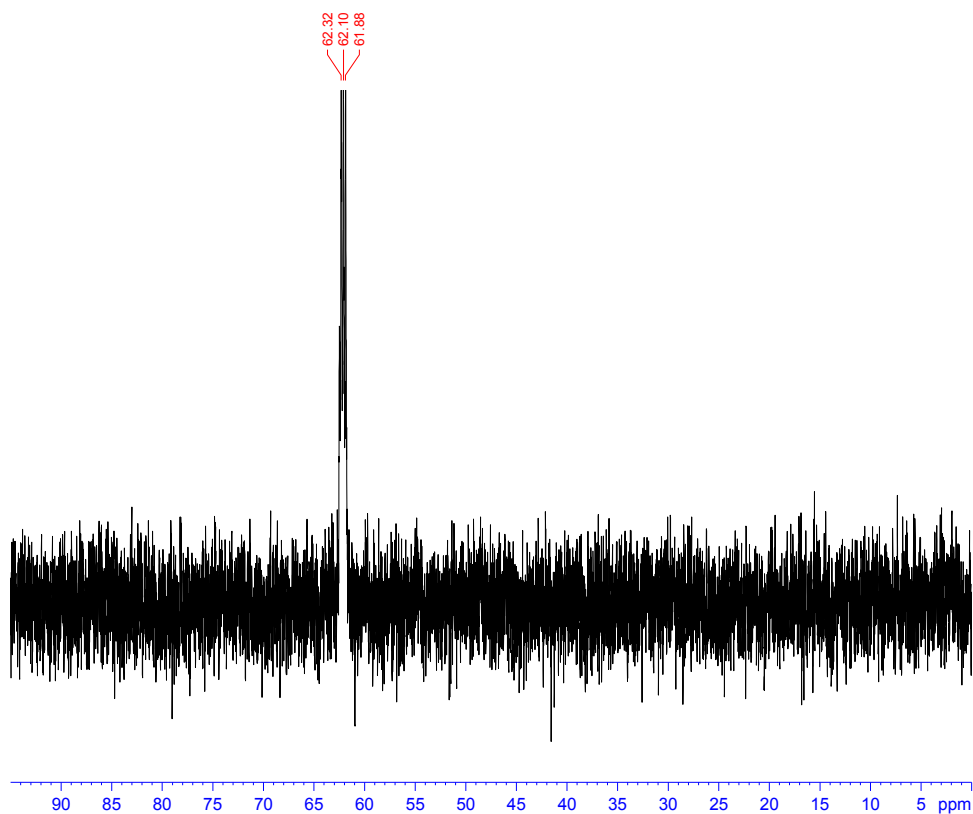

NAME kh101-prim  
EXPNO 10  
PROCNO 1  
Date\_ 20120511  
Time\_ 16.27  
INSTRUM spect  
PROBHD 5 mm PABBO BB-  
PULPROG zgpg30  
TD 65536  
SOLVENT D2O  
NS 256  
DS 4  
SWH 24038.461 Hz  
FIDRES 0.366798 Hz  
AQ 1.3631988 sec  
RG 2050  
DW 20.800 usec  
DE 10.04 usec  
TE 300.0 K  
D1 2.00000000 sec  
D11 0.03000000 sec  
TDO 1

===== CHANNEL f1 =====  
NUC1  $^{13}\text{C}$   
P1 7.80 usec  
PL1 -3.60 dB  
PL1W 82.8634991 W  
SFO1 100.6228298 MHz

===== CHANNEL f2 =====  
CPDPRG2 waltz16  
NUC2  $^1\text{H}$   
PCPD2 80.00 usec  
PL2 -4.00 dB  
PL12 14.24 dB  
PL13 14.24 dB  
PL2W 24.60733604 W  
PL12W 0.36903250 W  
PL13W 0.36903250 W  
SFO2 400.1316005 MHz  
SI 65536  
SF 100.6127690 MHz  
WDW EM  
SSB 0  
LB 1.00 Hz  
GB 0  
PC 1.40

### S15 $^2\text{H}$ of ethylene glycol-d2

kahprim

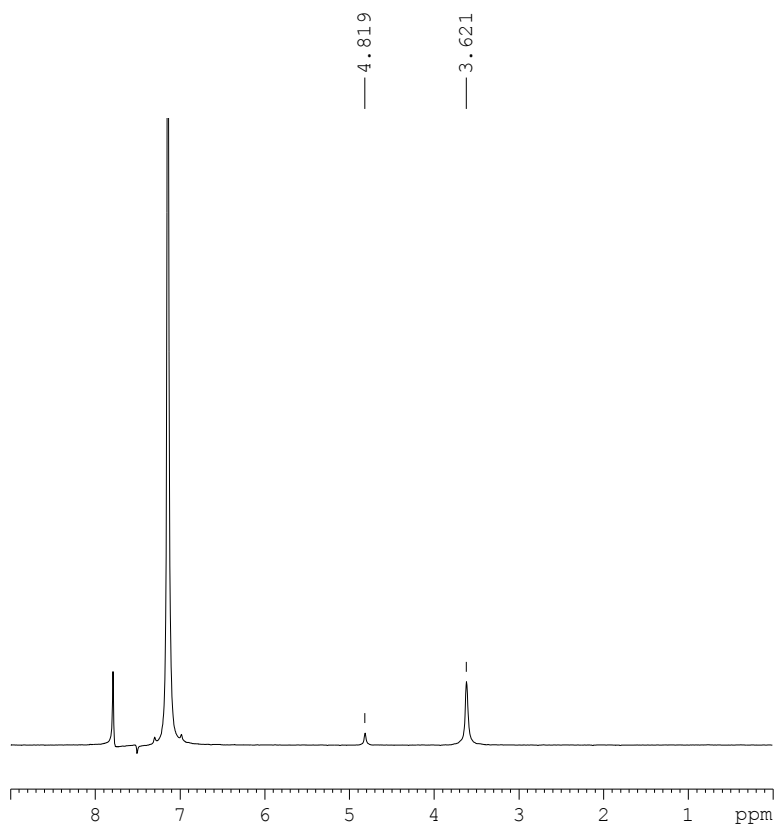

```
NAME          kahprim
EXPNO         20
PROCNO        1
Date_         20070515
Time_         15.14
INSTRUM       spect
PROBHD        5 mm Multinucl
PULPROG       zg30
TD            4096
SOLVENT       C6D6
NS            128
DS            8
SWH           1531.863 Hz
FIDRES        0.373990 Hz
AQ            1.3369844 sec
RG            500
DW            326.400 usec
DE            7.11 usec
TE            293.2 K
D1            0.50000000 sec
MCREST        0.00000000 sec
MCWRK         0.01500000 sec
```

```
===== CHANNEL f1 =====
NUC1          2H
P1            400.00 usec
PL1           5.00 dB
SFO1          76.7735374 MHz
SI            4096
SF            76.7729606 MHz
WDW           EM
SSB           0
LB            1.00 Hz
GB            0
PC            1.00
```

### S16 $^1\text{H}$ of 2,3-butanediol-d<sub>2</sub>

kh101-2,3butanediol

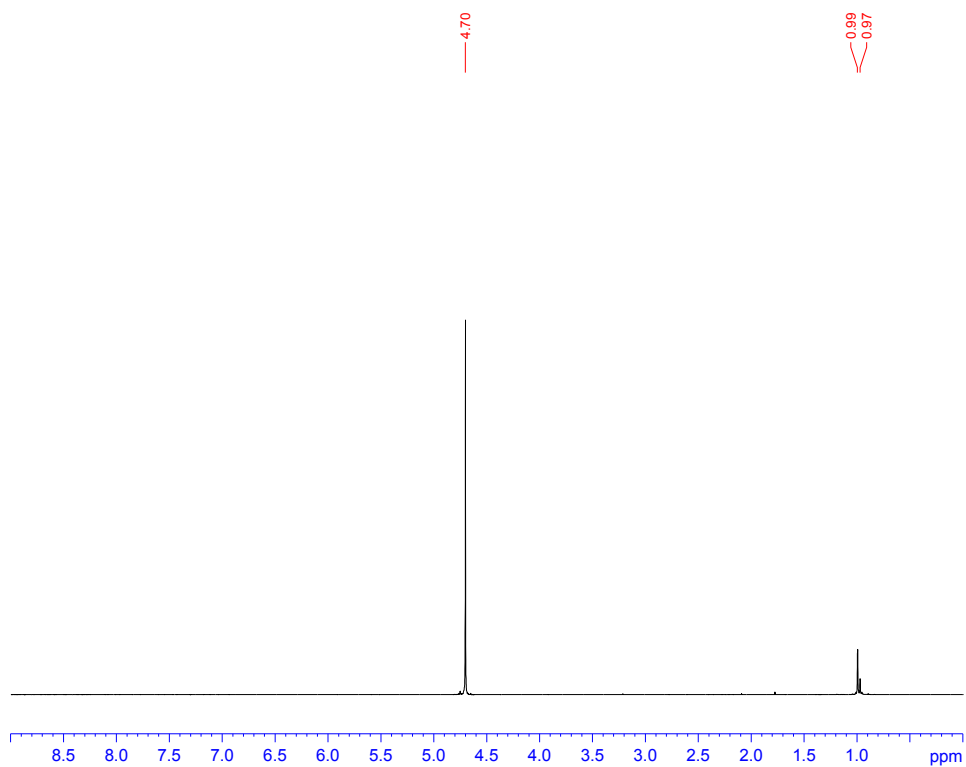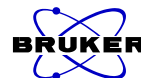

NAME kh101-2,3butanediol  
EXPNO 20  
PROCNO 1  
Date\_ 20120417  
Time 15.52  
INSTRUM spect  
PROBHD 5 mm PABBO BB-  
PULPROG zg30  
TD 65536  
SOLVENT D2O  
NS 16  
DS 0  
SWH 8223.685 Hz  
FIDRES 0.125483 Hz  
AQ 3.9846387 sec  
RG 161  
DW 60.800 usec  
DE 16.92 usec  
TE 300.0 K  
D1 1.00000000 sec  
TD0 1

===== CHANNEL f1 =====  
NUC1 1H  
P1 9.80 usec  
PL1 -4.00 dB  
PL1W 24.60733604 W  
SFO1 400.1324710 MHz  
SI 32768  
SF 400.1300000 MHz  
WDW EM  
SSB 0  
LB 0.30 Hz  
GB 0  
PC 1.40



S17  $^{13}\text{C}$  of 2,3-butanediol-d2

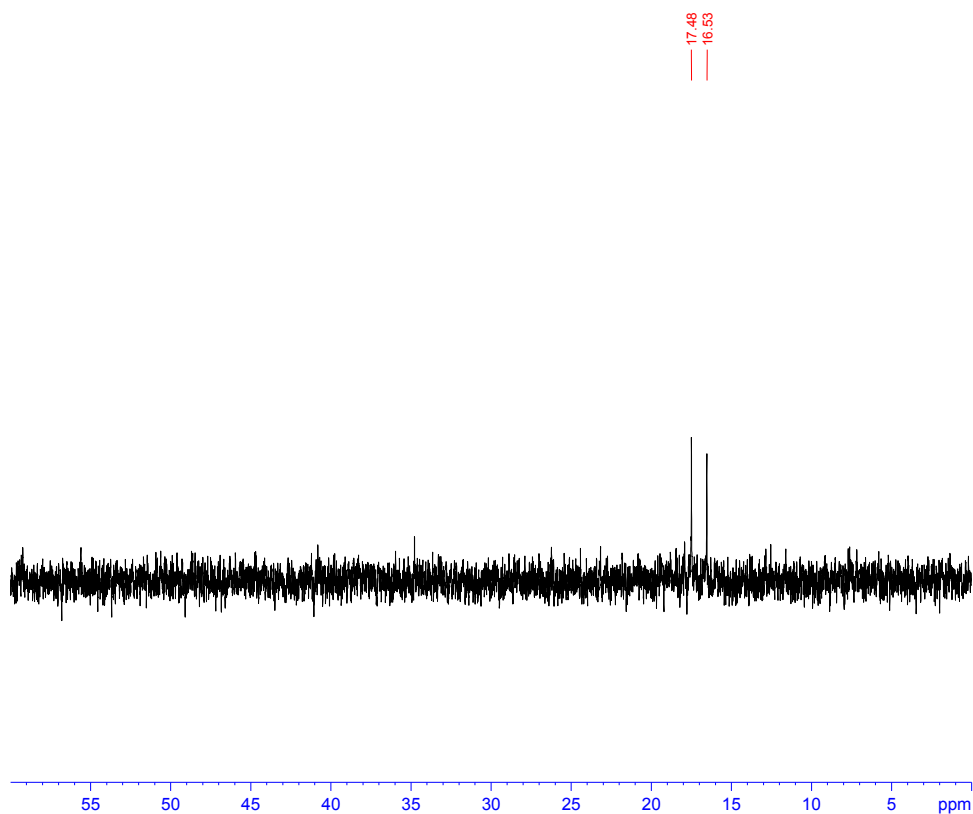

NAME kh101-2,3butanediol  
EXPNO 21  
PROCNO 1  
Date\_ 20120417  
Time\_ 20.09  
INSTRUM spect  
PROBHD 5 mm PABBO BB-  
PULPROG zgpg30  
TD 65536  
SOLVENT D2O  
NS 512  
DS 4  
SWH 24038.461 Hz  
FIDRES 0.366798 Hz  
AQ 1.3631988 sec  
RG 2050  
DW 20.800 usec  
DE 10.04 usec  
TE 300.0 K  
D1 2.0000000 sec  
D11 0.03000000 sec  
TD0 1

==== CHANNEL f1 =====  
NUC1  $^{13}\text{C}$   
P1 7.80 usec  
PL1 -3.60 dB  
PL1W 82.8634991 W  
SFO1 100.6228298 MHz

==== CHANNEL f2 =====  
CPDPRG2 waltz16  
NUC2  $^1\text{H}$   
PCPD2 80.00 usec  
PL2 -4.00 dB  
PL12 14.24 dB  
PL13 14.24 dB  
PL2W 24.60733604 W  
PL12W 0.36903250 W  
PL13W 0.36903250 W  
SFO2 400.1316005 MHz  
SI 65536  
SF 100.6127690 MHz  
WDW EM  
SSB 0  
LB 1.00 Hz  
GB 0  
PC 1.40

### S18 $^2\text{H}$ of 2,3-butanediol-d2

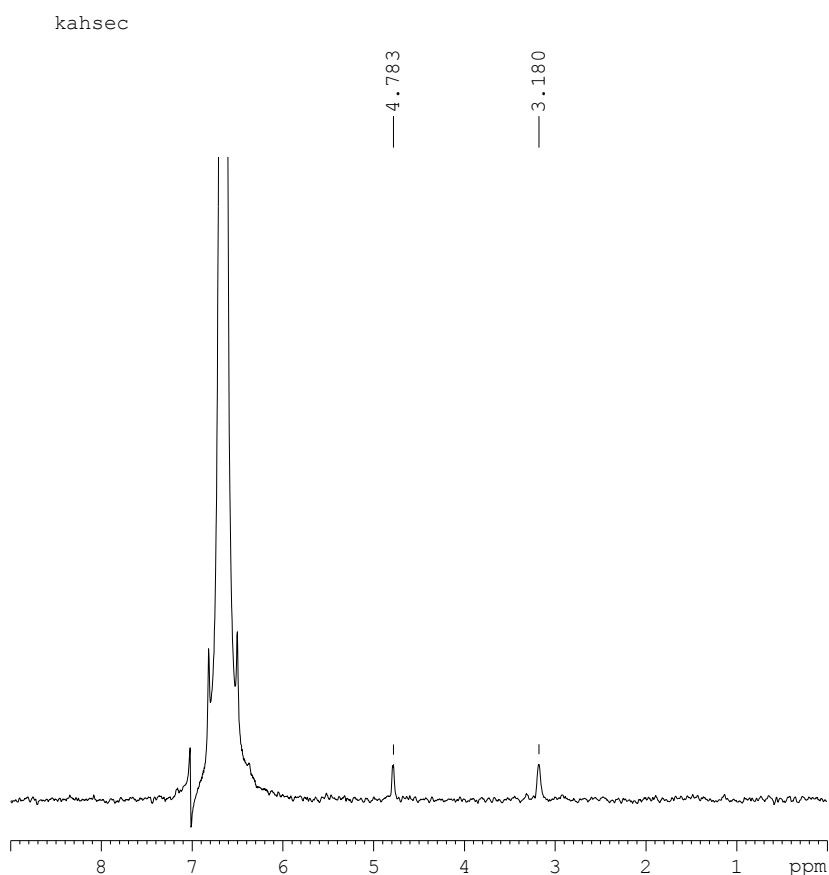

```
NAME          KAHS6CDOM
EXPNO         10
PROCNO        1
Date_         20061109
Time_         10.23
INSTRUM       spect
PROBHD        5 mm Multinucl
PULPROG       zg30
TD            4096
SOLVENT       C6D6
NS            128
DS            4
SWH           1531.863 Hz
FIDRES        0.373990 Hz
AQ            1.3369844 sec
RG            500
DW            326.400 usec
DE            7.11 usec
TE            293.2 K
D1            1.00000000 sec
MCREST        0.00000000 sec
MCWRK         0.01500000 sec
```

```
===== CHANNEL f1 =====
NUC1          2H
P1            400.00 usec
PL1           5.00 dB
SFO1          76.7735374 MHz
SI            4096
SF            76.7729984 MHz
WDW           EM
SSB           0
LB            1.00 Hz
GB            0
PC            1.00
```

### S19 <sup>1</sup>H of 2,3- pinacol-d6

kahtert

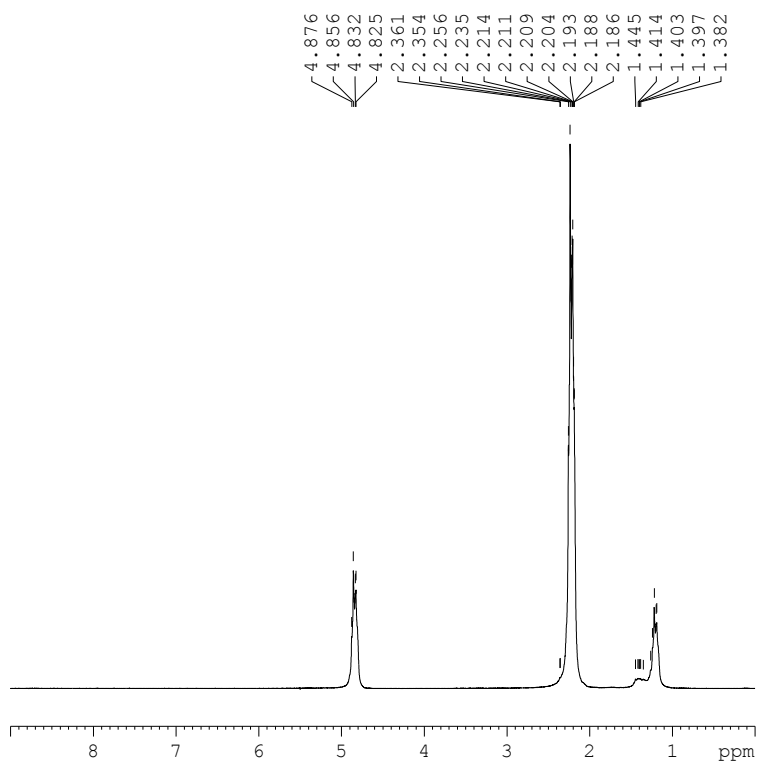

```
NAME          KAhtert
EXPNO          30
PROCNO         1
Date_          20071030
Time           16.57
INSTRUM        spect
PROBHD         5 mm Multinucl
PULPROG        zg30
TD             65536
SOLVENT        D2O
NS             16
DS             4
SWH            7507.507 Hz
FIDRES         0.114555 Hz
AQ            4.3647475 sec
RG            80.6
DW            66.600 usec
DE            7.11 usec
TE            0.0 K
D1            2.00000000 sec
MCREST        0.00000000 sec
MCWRK         0.01500000 sec
```

```
===== CHANNEL f1 =====
NUC1           1H
P1             6.00 usec
PL1           -3.00 dB
SFO1          500.1327507 MHz
SI            32768
SF            500.1300000 MHz
WDW            EM
SSB            0
LB            0.10 Hz
GB            0
PC            1.00
```

S20 <sup>13</sup>C of pinacol-d6

kahtert

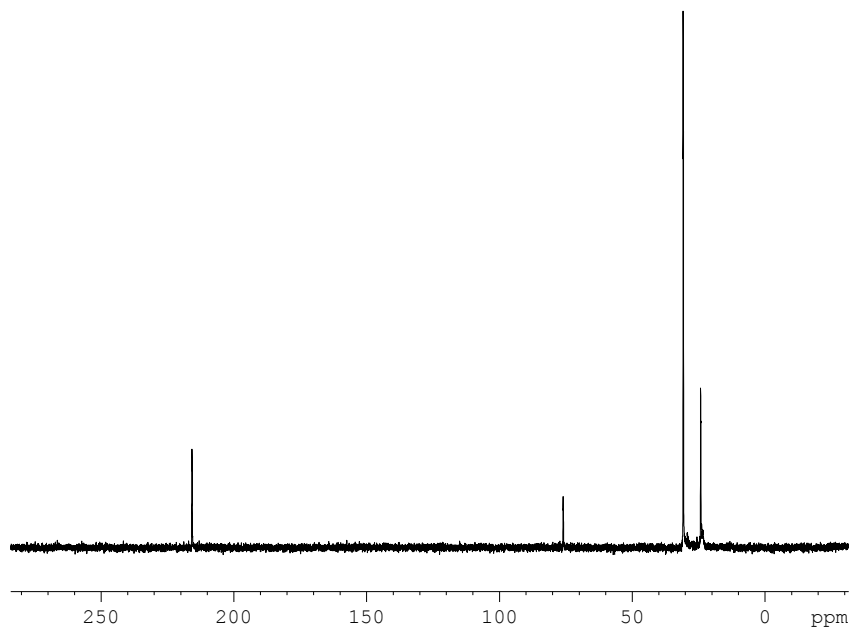

```
NAME          KAhtert
EXPNO         32
PROCNO        1
Date_         20071030
Time_         17.45
INSTRUM       spect
PROBHD        5 mm Multinucl
PULPROG       zgpg
TD            65536
SOLVENT       D2O
NS            1024
DS            4
SWH           39682.539 Hz
FIDRES        0.605507 Hz
AQ            0.8258036 sec
RG            1448.2
DW            12.600 usec
DE            5.50 usec
TE            0.0 K
D1            1.00000000 sec
d11           0.03000000 sec
DELTA         0.89999998 sec
MCREST        0.00000000 sec
MCWRK         0.01500000 sec
```

```
===== CHANNEL f1 =====
NUC1          13C
P1            7.00 usec
PL1           0.00 dB
SFO1         125.7736214 MHz
```

```
===== CHANNEL f2 =====
CPDPRG2       waltz16
NUC2          1H
PCPD2         100.00 usec
PL2           120.00 dB
PL12          14.00 dB
PL13          20.00 dB
SFO2         500.1320005 MHz
```

### S21 $^2\text{H}$ of pinacol-d6

kahtert

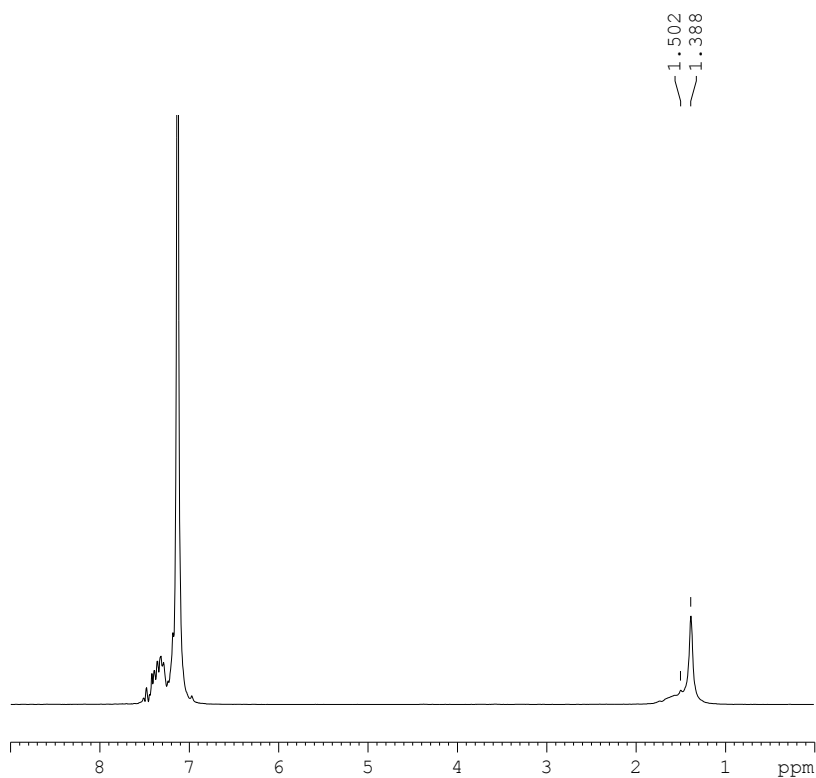

```
NAME           KAhtert
EXPNO          11
PROCNO         1
Date_          20070404
Time_          14.21
INSTRUM        spect
PROBHD         5 mm Multinucl
PULPROG        zg30
TD             4096
SOLVENT        D2O
NS             128
DS             4
SWH            1531.863 Hz
FIDRES         0.373990 Hz
AQ             1.3369844 sec
RG             500
DW             326.400 usec
DE             7.11 usec
TE             0.0 K
D1             1.00000000 sec
MCREST         0.00000000 sec
MCWRK          0.01500000 sec
```

```
===== CHANNEL f1 =====
NUC1           2H
P1             400.00 usec
PL1            5.00 dB
SFO1           76.7735374 MHz
SI             4096
SF             76.7729617 MHz
WDW            EM
SSB            0
LB             1.00 Hz
GB             0
PC             1.00
```

### S22 $^1\text{H}$ of 1,2-cyclohexanediol-d<sub>2</sub>

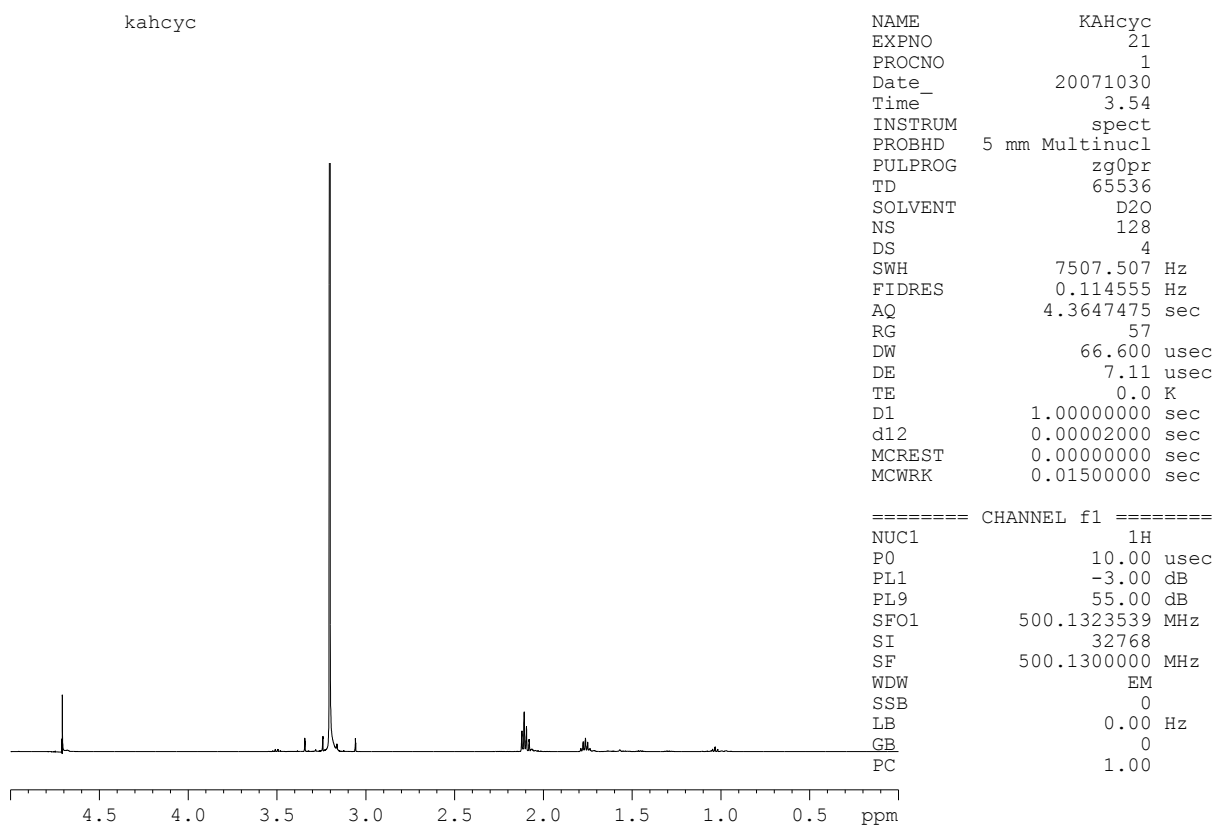

S23 <sup>13</sup>C of 1,2-cyclohexanediol-d2

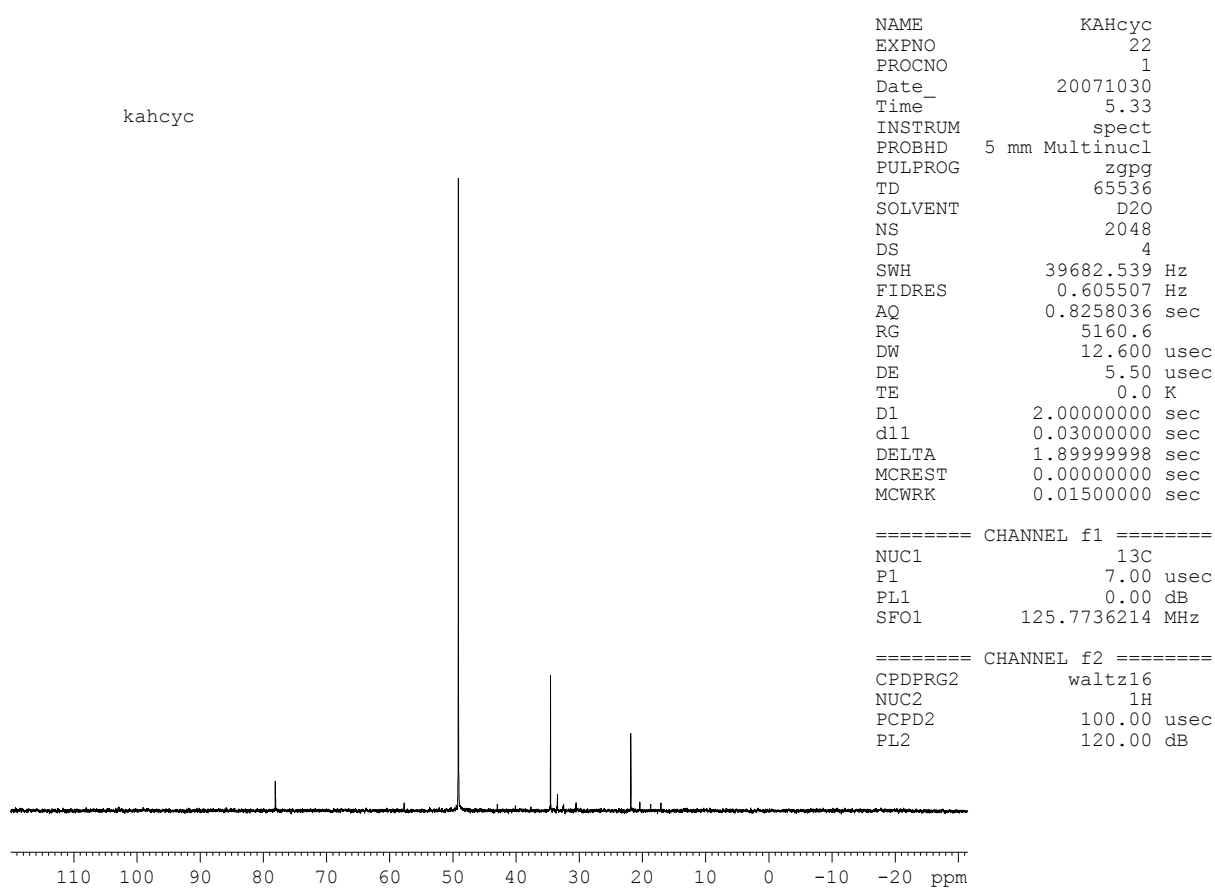

S24  $^2\text{H}$  of 1,2-cyclohexanediol-d<sub>2</sub>

kahcyclic

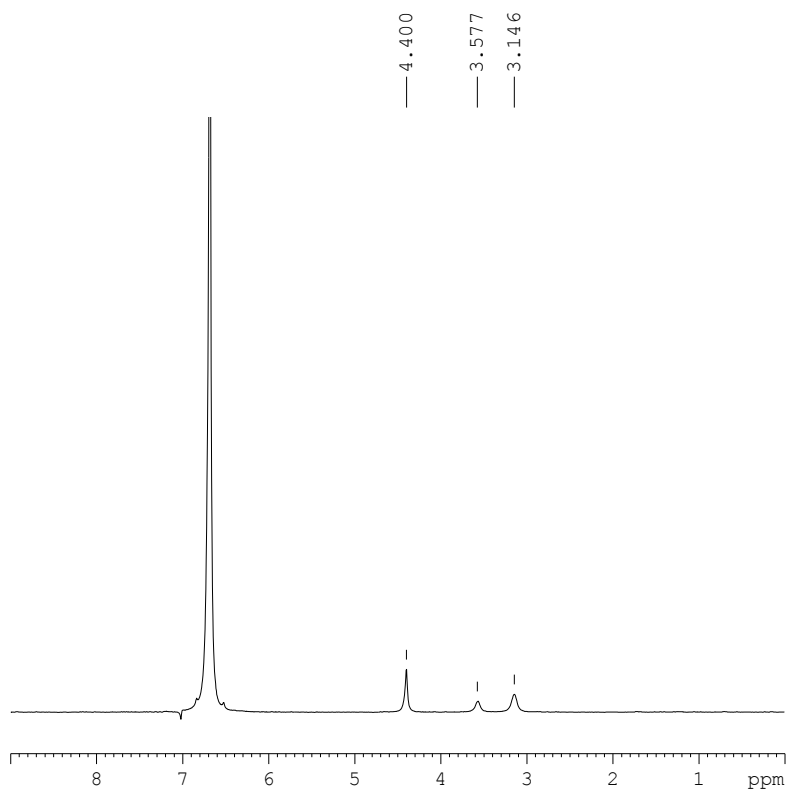

NAME KAHCYCH2O  
EXPNO 10  
PROCNO 1  
Date\_ 20061109  
Time\_ 12.28  
INSTRUM spect  
PROBHD 5 mm Multinucl  
PULPROG zg30  
TD 4096  
SOLVENT C6D6  
NS 128  
DS 4  
SWH 1531.863 Hz  
FIDRES 0.373990 Hz  
AQ 1.3369844 sec  
RG 500  
DW 326.400 usec  
DE 7.11 usec  
TE 293.4 K  
D1 1.00000000 sec  
MCREST 0.00000000 sec  
MCWRK 0.01500000 sec

===== CHANNEL f1 =====  
NUC1 2H  
P1 400.00 usec  
PL1 5.00 dB  
SFO1 76.7735374 MHz  
SI 4096  
SF 76.7729984 MHz  
WDW EM  
SSB 0  
LB 1.00 Hz  
GB 0  
PC 1.00



S25  $^1\text{H}$  dichloroethane-d2

kh101-prim cl

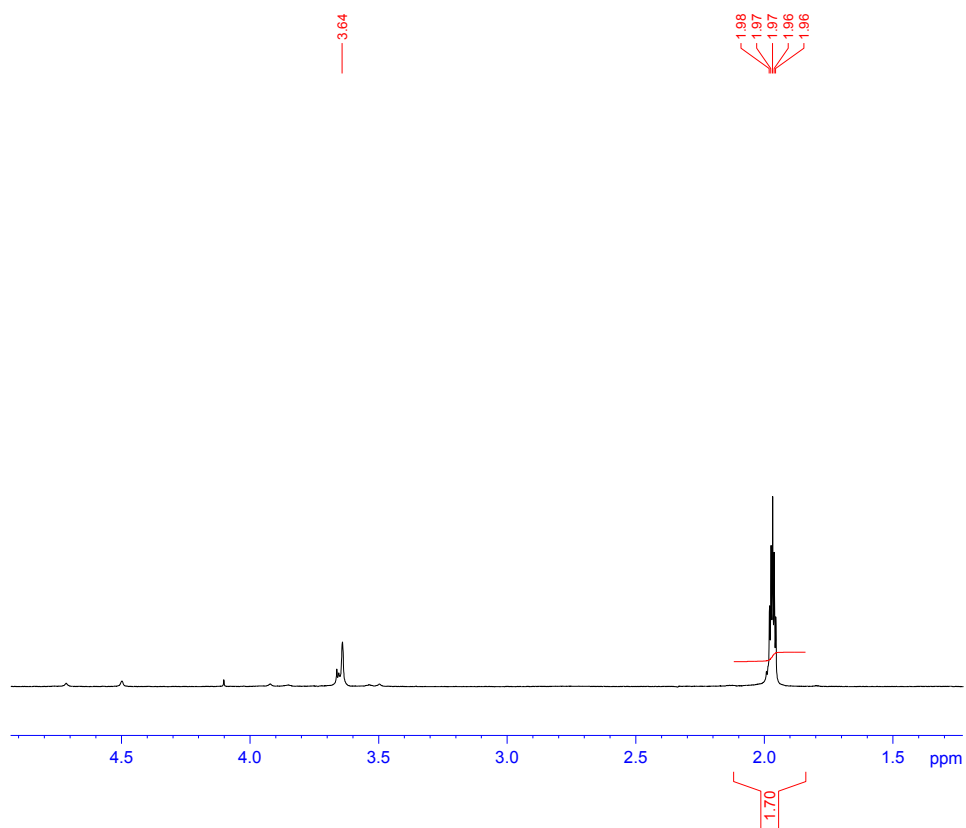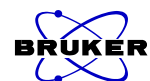

NAME kh101-prim cl  
EXPNO 30  
PROCNO 1  
Date\_ 20120625  
Time 12.05  
INSTRUM spect  
PROBHD 5 mm PABBO BB-  
PULPROG zg30  
TD 65536  
SOLVENT CD3CN  
NS 16  
DS 0  
SWH 8223.685 Hz  
FIDRES 0.125483 Hz  
AQ 3.9846387 sec  
RG 32  
DW 60.800 usec  
DE 16.92 usec  
TE 300.0 K  
D1 1.00000000 sec  
TD0 1

===== CHANNEL f1 =====  
NUC1 1H  
P1 9.80 usec  
PL1 -4.00 dB  
PL1W 24.60733604 W  
SFO1 400.1324710 MHz  
SF 32768  
SF 400.1300000 MHz  
WDW EM  
SSB 0  
LB 0.30 Hz  
GB 0  
PC 1.40

S26  $^2\text{H}$  dichloroethane-d2

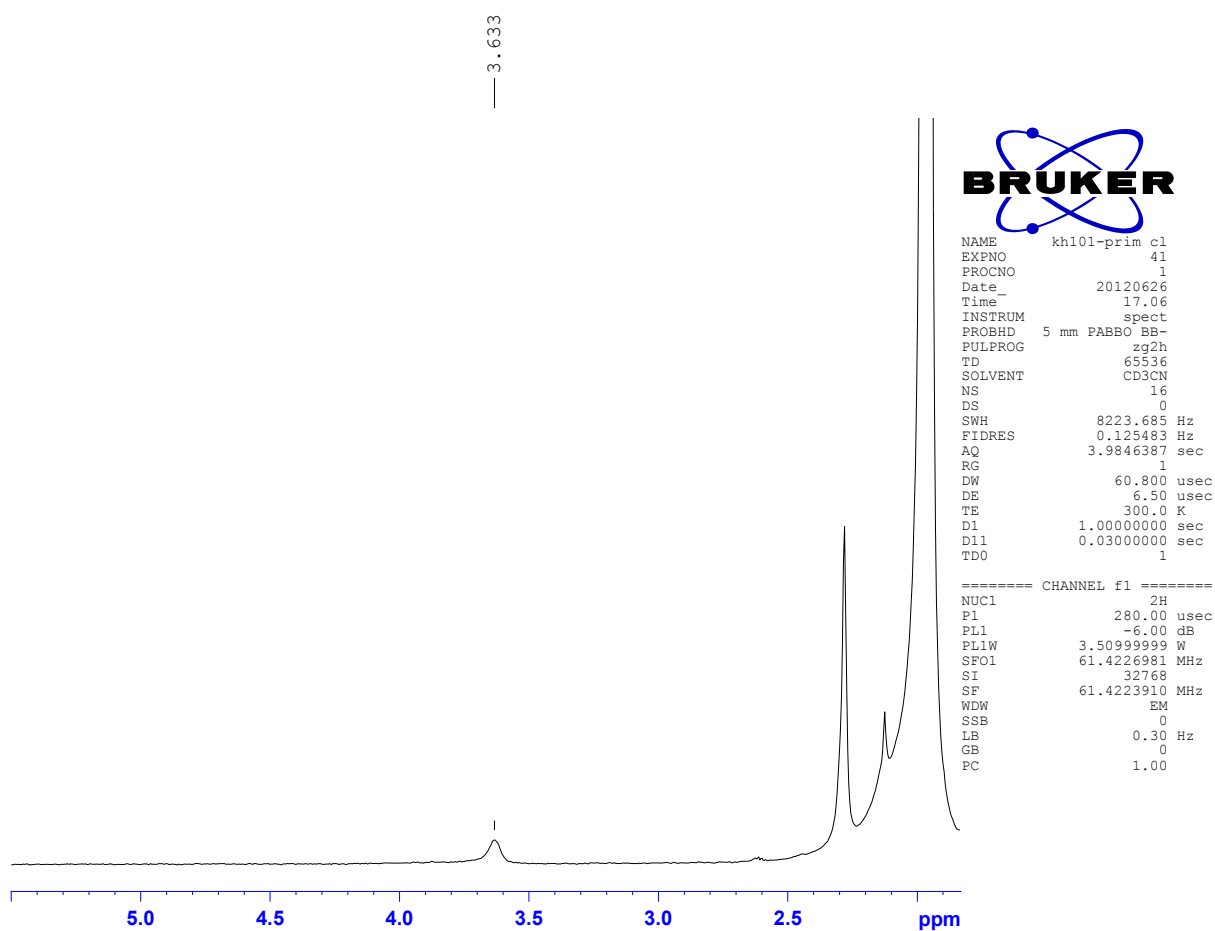

S27 <sup>13</sup>C dichloroethane-d2

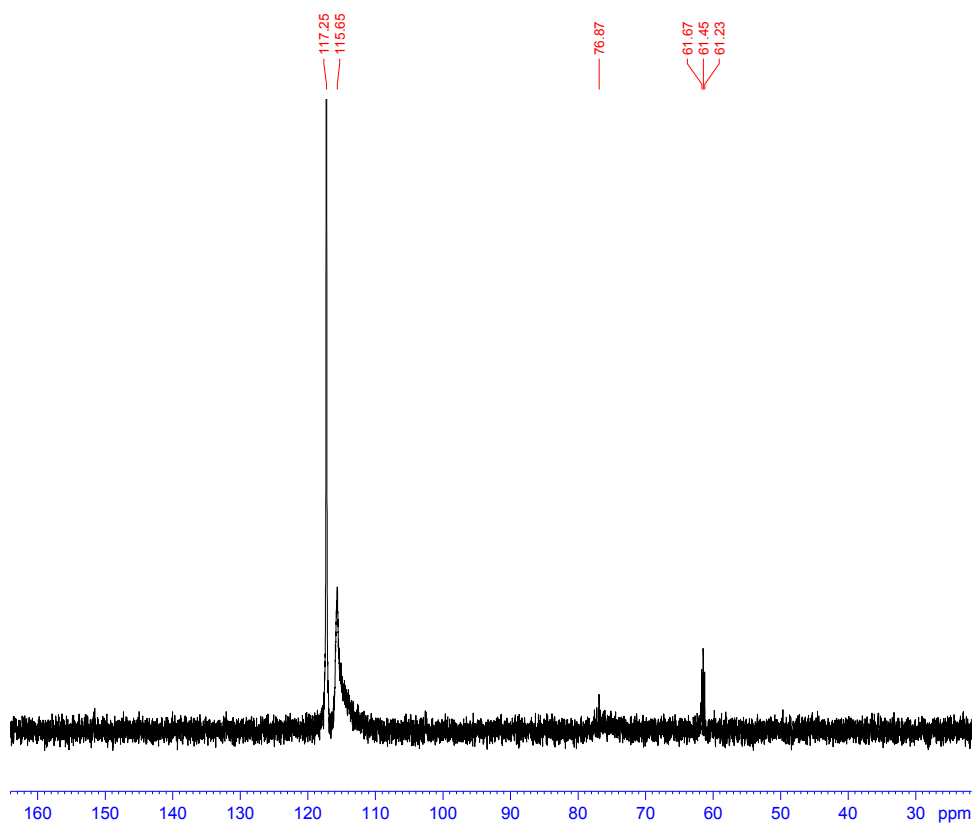

NAME kh101-prim d  
EXPNO 50  
PROCNO 1  
Date\_ 20120626  
Time\_ 18.38  
INSTRUM spect  
PROBHD 5 mm PABBO BB-  
PULPROG zgpg30  
TD 65536  
SOLVENT CD3CN  
NS 512  
DS 4  
SWH 24038.461 Hz  
FIDRES 0.366798 Hz  
AQ 1.3631988 sec  
RG 2050  
DW 20.800 usec  
DE 10.04 usec  
TE 300.0 K  
D1 2.00000000 sec  
D11 0.03000000 sec  
TD0 1

===== CHANNEL f1 =====  
NUC1 <sup>13</sup>C  
P1 7.80 usec  
PL1 -3.60 dB  
PL1W 82.8634991 W  
SFO1 100.6228298 MHz

===== CHANNEL f2 =====  
CPDPRG2 waltz16  
NUC2 <sup>1</sup>H  
PCPD2 80.00 usec  
PL2 -4.00 dB  
PL12 14.24 dB  
PL13 14.24 dB  
PL2W 24.60733604 W  
PL12W 0.36903250 W  
PL13W 0.36903250 W  
SFO2 400.1316005 MHz  
SI 65536  
SF 100.6128570 MHz  
WDW EM  
SSB 0  
LB 1.00 Hz  
GB 0  
PC 1.40

S28 <sup>1</sup>H 2,3-dichlorobutane-d2

kh101-sec cl

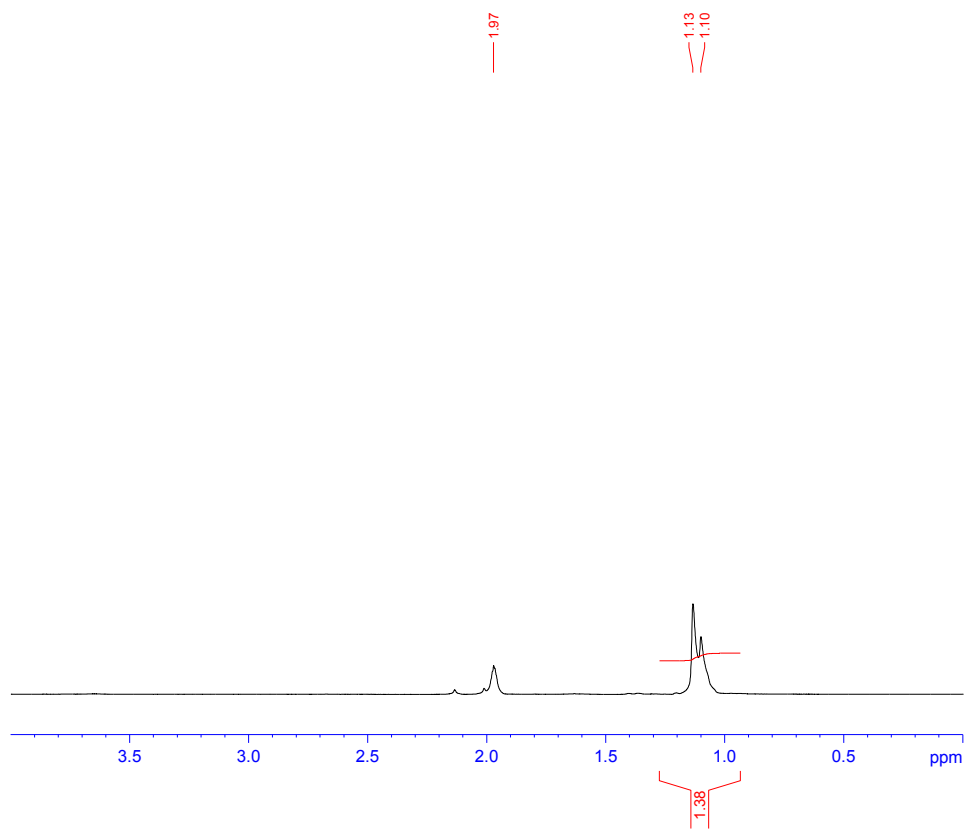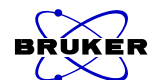

NAME kh101-sec cl  
EXPNO 30  
PROCNO 1  
Date\_ 20120625  
Time 15.45  
INSTRUM spect  
PROBHD 5 mm PABBO BB-  
PULPROG zg30  
TD 65536  
SOLVENT CD3CN  
NS 16  
DS 0  
SWH 8223.685 Hz  
FIDRES 0.125483 Hz  
AQ 3.9846387 sec  
RG 11.3  
DW 60.800 usec  
DE 16.92 usec  
TE 300.0 K  
D1 1.0000000 sec  
TD0 1

===== CHANNEL f1 =====  
NUC1 1H  
P1 9.80 usec  
PL1 -4.00 dB  
PL1W 24.60733604 W  
SFO1 400.1324710 MHz  
SI 32768  
SF 400.1300000 MHz  
WDW EM  
SSB 0  
LB 0.30 Hz  
GB 0  
PC 1.40

### S29 <sup>2</sup>H 2,3dichlorobutane-d2

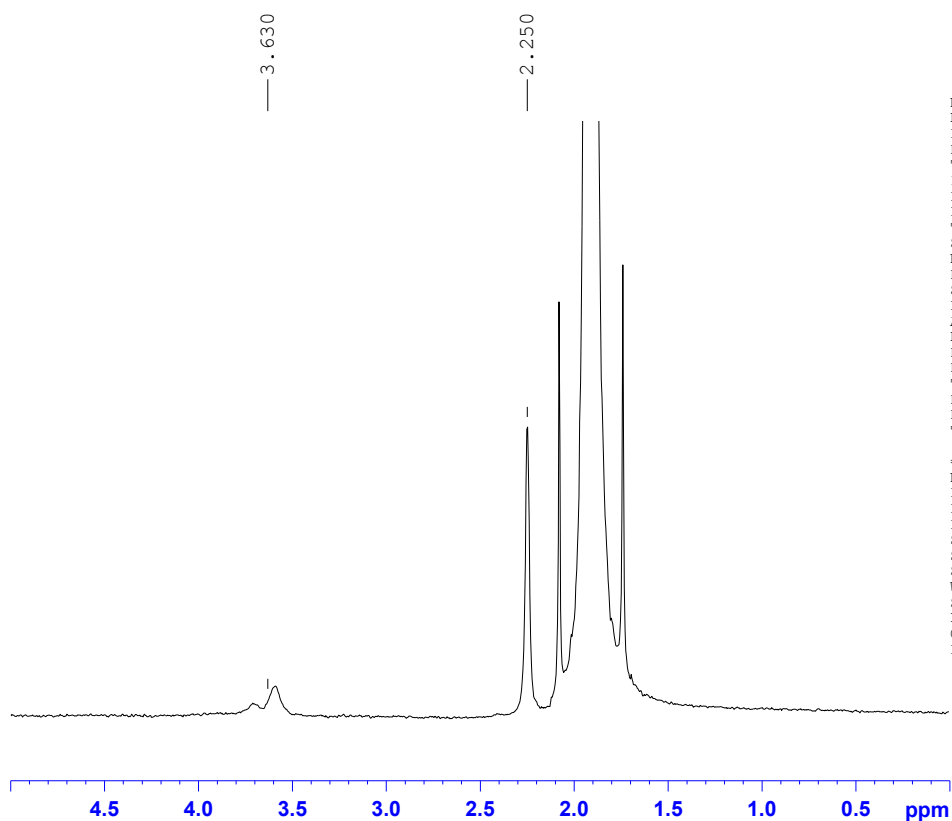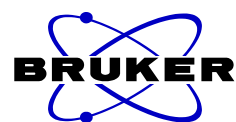

```
NAME      kh101-sec c1
EXPNO     32
PROCNO    1
Date_     20120626
Time      17.14
INSTRUM   spect
PROBHD    5 mm PABBO BB-
PULPROG   zg2h
TD         65536
SOLVENT   CD3CN
NS         16
DS         0
SWH       8223.685 Hz
FIDRES    0.125483 Hz
AQ         3.9846387 sec
RG         1
DW         60.800 usec
DE         6.50 usec
TE         300.0 K
D1         1.00000000 sec
D11        0.03000000 sec
TD0        1
```

```
===== CHANNEL f1 =====
NUC1      2H
P1        280.00 usec
PL1       -6.00 dB
PL1W      3.50999999 W
SFO1      61.4226981 MHz
SI         32768
SF         61.4223910 MHz
WDW        EM
SSB        0
LB         0.30 Hz
GB         0
PC         1.00
```

S30 <sup>13</sup>C 2,3-dichlorobutane-d2

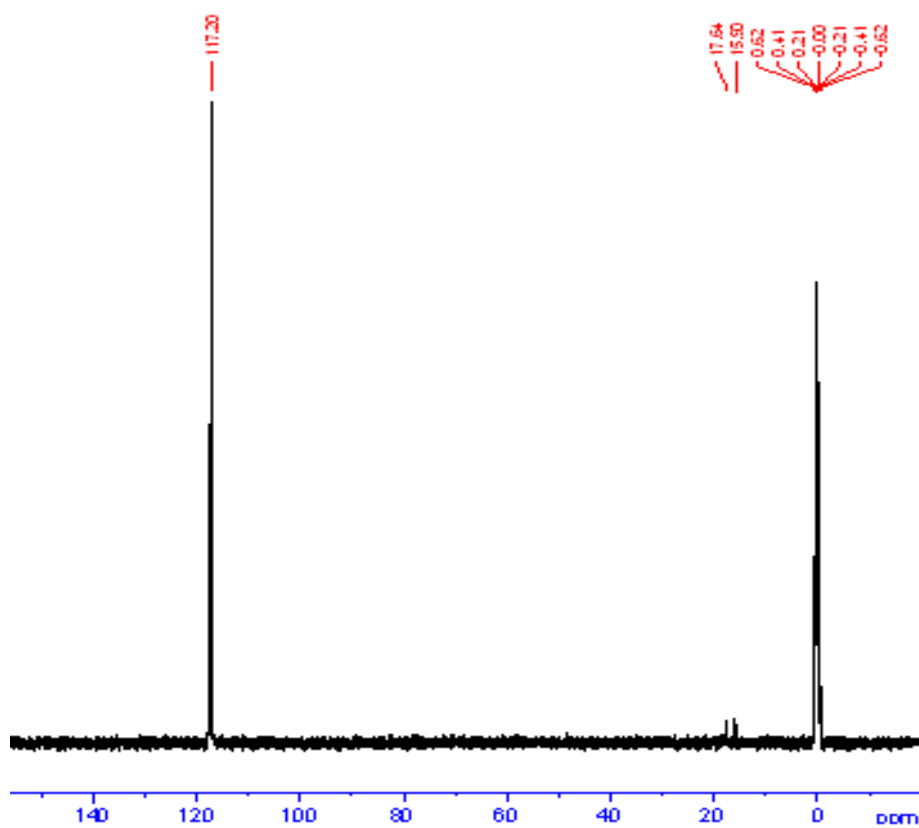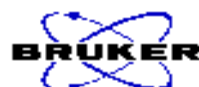

NAME M101-sec d  
EXPNO 31  
PROCNO 1  
Date\_ 20120628  
Time 2.00  
INS TRUM spect  
PROBHD 5 mm PAU5Q5B5  
PULPROG zgpg30  
TD 65536  
SOLVENT CD3CN  
NS 512  
DS 4  
SWH 24038.461 Hz  
FIDRES 0.366798 Hz  
AQ 1.3831988 sec  
RG 209.0  
DW 2.0300 usec  
DE 10.04 usec  
TE 300.0 K  
D1 2.0000000 sec  
D11 0.0300000 sec  
TD0 1

----- CHANNEL f1 -----  
NUC1 <sup>13</sup>C  
P1 7.80 usec  
PL1 -3.80 dB  
PL1W 82.86334561 W  
SFO1 100.6228258 MHz

----- CHANNEL f2 -----  
C13PRG2 waltz16  
NUC2 <sup>1</sup>H  
PCPD2 80.00 usec  
PL2 -4.00 dB  
PL12 14.24 dB  
PL13 14.24 dB  
PL2W 24.60733604 W  
PL12W 0.36903250 W  
PL13W 0.36903250 W  
SFO2 400.1519905 MHz  
SE 65536  
SF 100.6128193 MHz  
WDW EM  
SSB 0  
LB 1.00 Hz  
GB 0  
PC 1.40

S31 attempt to prepare  $^1\text{H}$  2,3-dichloro-2,3-dimethylbutane-d<sub>6</sub> by direct HCl chlorination led to the pinacolic rearrangement deuteriated products (see  $^{13}\text{C}$  NMR below)  $\delta$  2.15ppm and 1.2ppm according to Aldrich)

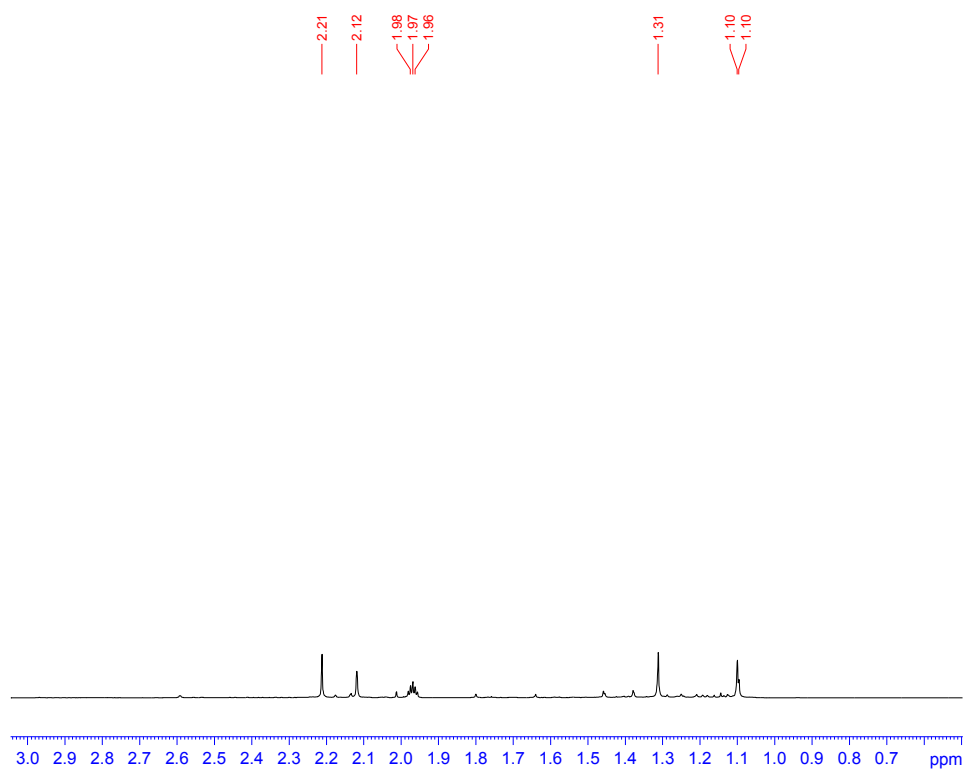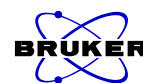

```
NAME kh101-tert cl
EXPNO 10
PROCNO 1
Date_ 20120803
Time 9.38
INSTRUM spect
PROBHD 5 mm PABBO BB-
PULPROG zg30
TD 65536
SOLVENT CD3CN
NS 16
DS 0
SWH 8223.685 Hz
FIDRES 0.125483 Hz
AQ 3.9846387 sec
RG 20.2
DW 60.800 usec
DE 16.82 usec
TE 300.0 K
D1 1.0000000 sec
TD0 1
```

```
===== CHANNEL f1 =====
NUC1 1H
P1 9.80 usec
PL1 -4.00 dB
PL1W 24.60733604 W
SFO1 400.1324710 MHz
SI 32768
SF 400.1300000 MHz
WDW EM
SSB 0
LB 0.30 Hz
GB 0
PC 1.40
```

### S32 $^2\text{H}$ 2,3-dichloro-2,3-dimethylbutane-d6

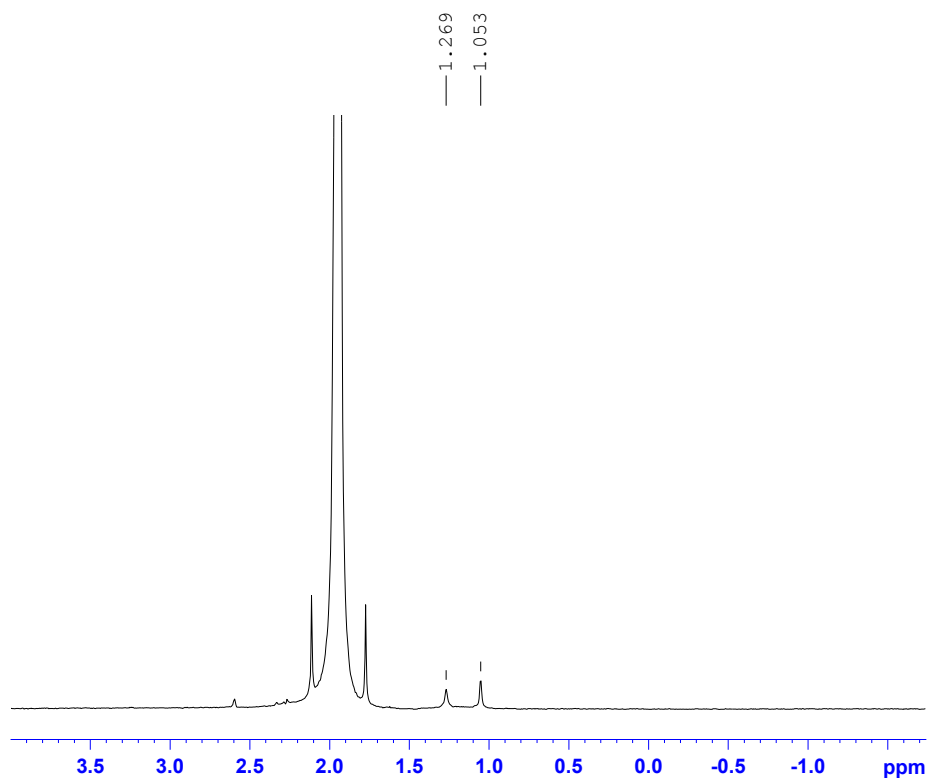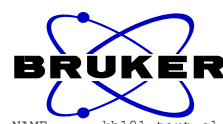

```
NAME      kh101-tert c1
EXPNO     1
PROCNO    1
Date_     20120803
Time      9.43
INSTRUM   spect
PROBHD    5 mm PABBO BB-
PULPROG   zg2h
TD        65536
SOLVENT   CD3CN
NS        16
DS        0
SWH       8223.685 Hz
FIDRES    0.125483 Hz
AQ        3.9846387 sec
RG        1
DW        60.800 usec
DE        6.50 usec
TE        300.0 K
D1        1.00000000 sec
D11       0.03000000 sec
TDO       1
```

```
===== CHANNEL f1 =====
NUC1      2H
P1        280.00 usec
PL1       -6.00 dB
PL1W      3.50999999 W
SFO1      61.4226981 MHz
SI        32768
SF        61.4223910 MHz
WDW       EM
SSB       0
LB        0.30 Hz
GB        0
PC        1.00
```



S33 <sup>13</sup>C 2,3-dichloro-2,3-dimethylbutane-d6 (+ pinacolic rearrangement product)

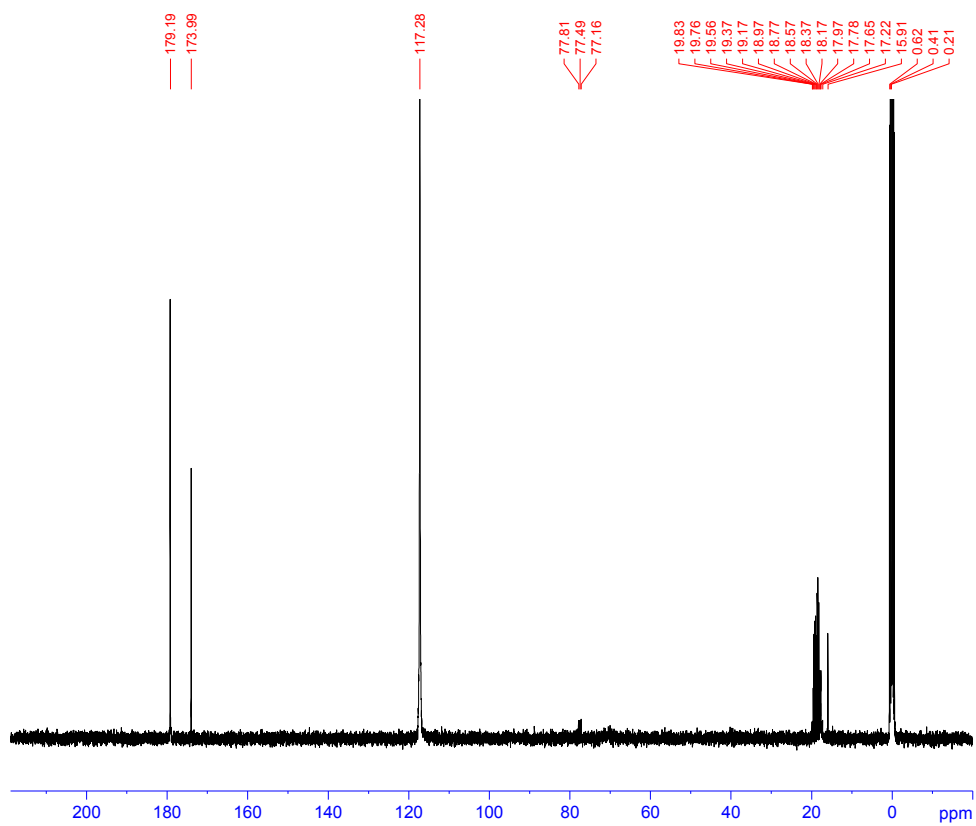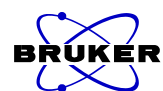

```
NAME KH-101-sec cl-CH3CN
EXPNO 20
PROCNO 1
Date_ 20120709
Time_ 18.19
INSTRUM spect
PROBHD 5 mm PABBO BB-
PULPROG zgpg30
TD 65536
SOLVENT CD3CN
NS 2048
DS 4
SWH 24038.461 Hz
FIDRES 0.366798 Hz
AQ 1.3631988 sec
RG 2050
DW 20.800 usec
DE 10.04 usec
TE 300.0 K
D1 2.00000000 sec
D11 0.03000000 sec
TD0 1

===== CHANNEL f1 =====
NUC1 13C
P1 7.80 usec
PL1 -3.60 dB
PL1W 82.86334991 W
SFO1 100.6228298 MHz

===== CHANNEL f2 =====
CPDPRG2 waltz16
NUC2 1H
PCPD2 80.00 usec
PL2 -4.00 dB
PL12 14.24 dB
PL13 14.24 dB
PL2W 24.60733604 W
PL12W 0.36903250 W
PL13W 0.36903250 W
SFO2 400.1316005 MHz
SI 65536
SF 100.6128258 MHz
WDW EM
SSB 0
LB 1.00 Hz
GB 0
PC 1.40
```

### S34 <sup>1</sup>H 1,2-dichlorocyclohexane-d2

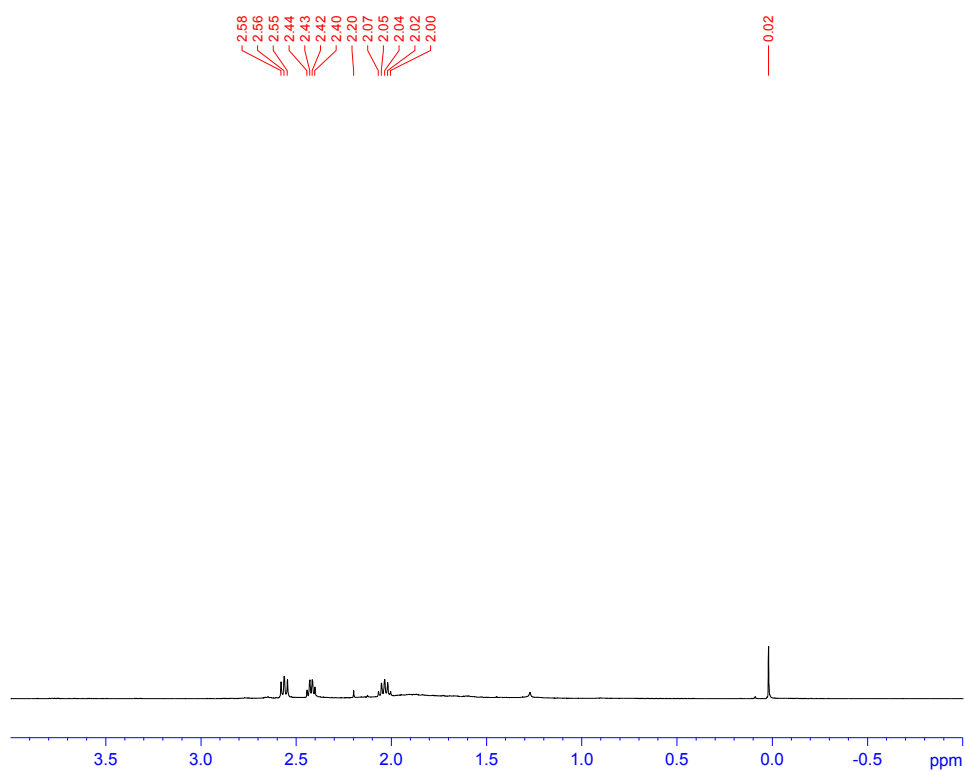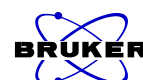

NAME kh101-cyc cl  
EXPNO 10  
PROCNO 1  
Date\_ 20120622  
Time\_ 16.13  
INSTRUM spect  
PROBHD 5 mm PABBO BB-  
PULPROG zg30  
TD 65536  
SOLVENT CDCl3  
NS 16  
DS 0  
SWH 8223.685 Hz  
FIDRES 0.125483 Hz  
AQ 3.9846387 sec  
RG 228  
DW 60.800 usec  
DE 16.92 usec  
TE 300.0 K  
D1 1.00000000 sec  
TD0 1

===== CHANNEL f1 =====  
NUC1 1H  
P1 9.80 usec  
PL1 -4.00 dB  
PL1W 24.60733604 W  
SFO1 400.1324710 MHz  
SI 32768  
SF 400.1300000 MHz  
WDW EM  
SSB 0  
LB 0.30 Hz  
GB 0  
PC 1.40

### S35 <sup>2</sup>H 1,2-dichlorocyclohexane-d2

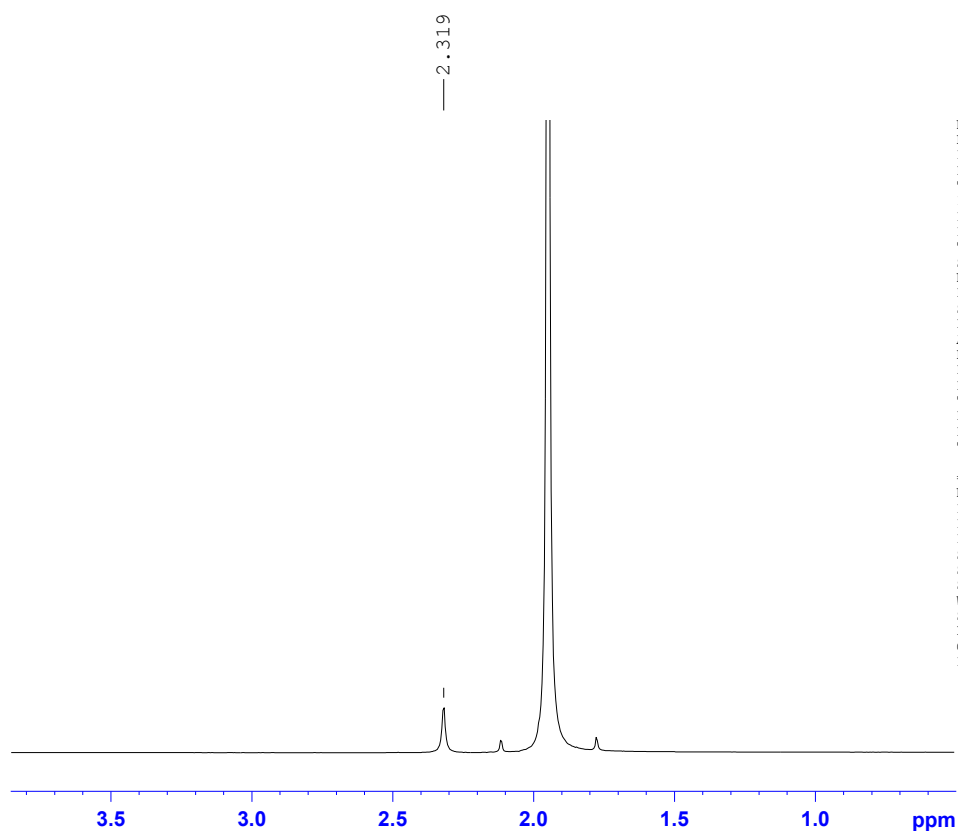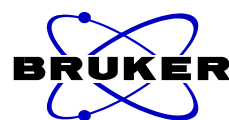

```
NAME kh101-cyc c1
EXPNO 32
PROCNO 1
Date_ 20120626
Time_ 17.24
INSTRUM spect
PROBHD 5 mm PABBO BB-
PULPROG zg2h
TD 65536
SOLVENT CD3CN
NS 16
DS 0
SWH 8223.685 Hz
FIDRES 0.125483 Hz
AQ 3.9846387 sec
RG 1
DW 60.800 usec
DE 6.50 usec
TE 300.0 K
D1 1.00000000 sec
D11 0.03000000 sec
TD0 1

===== CHANNEL f1 =====
NUC1 2H
P1 280.00 usec
PL1 -6.00 dB
PL1W 3.50999999 W
SFO1 61.4226981 MHz
SI 32768
SF 61.4223910 MHz
WDW EM
SSB 0
LB 0.30 Hz
GB 0
PC 1.00
```

S36  $^{13}\text{C}$  1,2-dichlorocyclohexane-d2

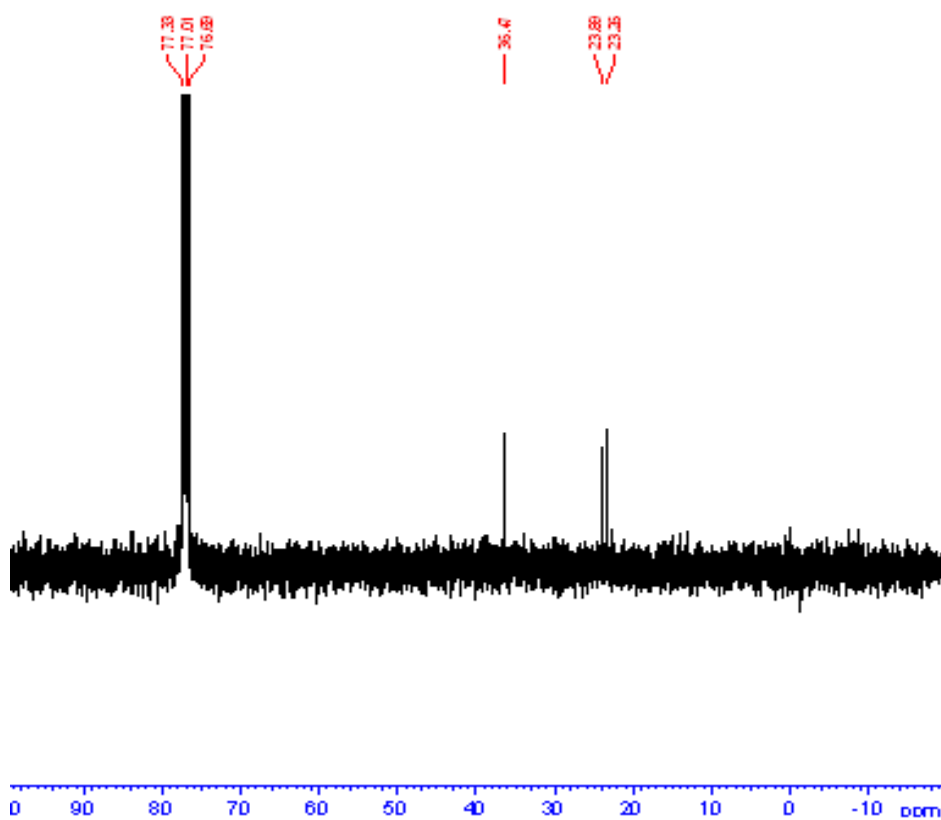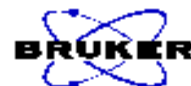

NAME h101-cyc d  
EXPNO 20  
PROCNO 1  
Date\_ 20120623  
Time 2:42  
INSTRUM spect  
PROBHD 5 mm PABBO BB-  
PULPROG zgpg30  
TD 65536  
SOLVENT CDCl3  
NS 512  
DS 4  
SWH 24038.481 Hz  
FIDRES 0.388798 Hz  
AQ 1.3631583 sec  
RG 2560  
DW 20.800 usec  
DE 10.04 usec  
TE 300.0 K  
D1 2.00000000 sec  
D11 0.03000000 sec  
TD0 1

----- CHANNEL f1 -----  
NUC1  $^{13}\text{C}$   
P1 7.80 usec  
PL1 -3.00 dB  
PL1W 82.86334591 W  
SFO1 100.6228258 MHz

----- CHANNEL f2 -----  
CPOPRG2 waltz16  
NUC2  $^1\text{H}$   
PCPD2 80.00 usec  
PL2 -4.00 dB  
PL12 14.24 dB  
PL13 14.24 dB  
PL2W 24.81073304 W  
PL12W 0.38903250 W  
PL13W 0.38903250 W  
SFO2 400.1519605 MHz  
SF 100.6127850 MHz  
WDW EM  
SSB 0  
LB 1.00 Hz  
GB 0  
PC 1.40

### S37 <sup>1</sup>H -ethylene glycol sulfite-d2

kh101-prim SO

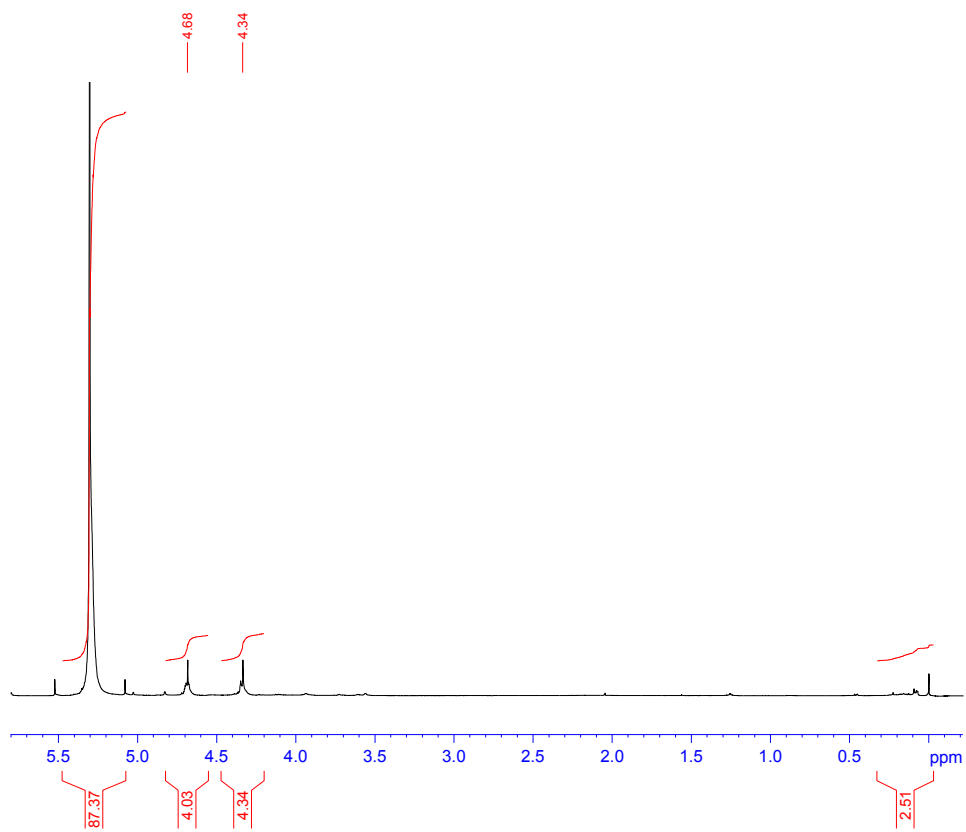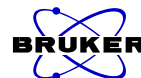

NAME kh101-prim SO  
EXPNO 10  
PROCNO 1  
Date\_ 20120625  
Time 17.16  
INSTRUM spect  
PROBHD 5 mm PABBO BB-  
PULPROG zg30  
TD 65536  
SOLVENT CDCl3  
NS 16  
DS 0  
SWH 8223.685 Hz  
FIDRES 0.125483 Hz  
AQ 3.9846387 sec  
RG 80.6  
DW 60.800 usec  
DE 16.92 usec  
TE 300.0 K  
D1 1.00000000 sec  
TD0 1

===== CHANNEL f1 =====  
NUC1 1H  
P1 9.80 usec  
PL1 -4.00 dB  
PL1W 24.60733604 W  
SFO1 400.1324710 MHz  
SI 32768  
SF 400.1300069 MHz  
WDW EM  
SSB 0  
LB 0.30 Hz  
GB 0  
PC 1.40

### S38 <sup>2</sup>H -ethylene glycol sulfite-d2

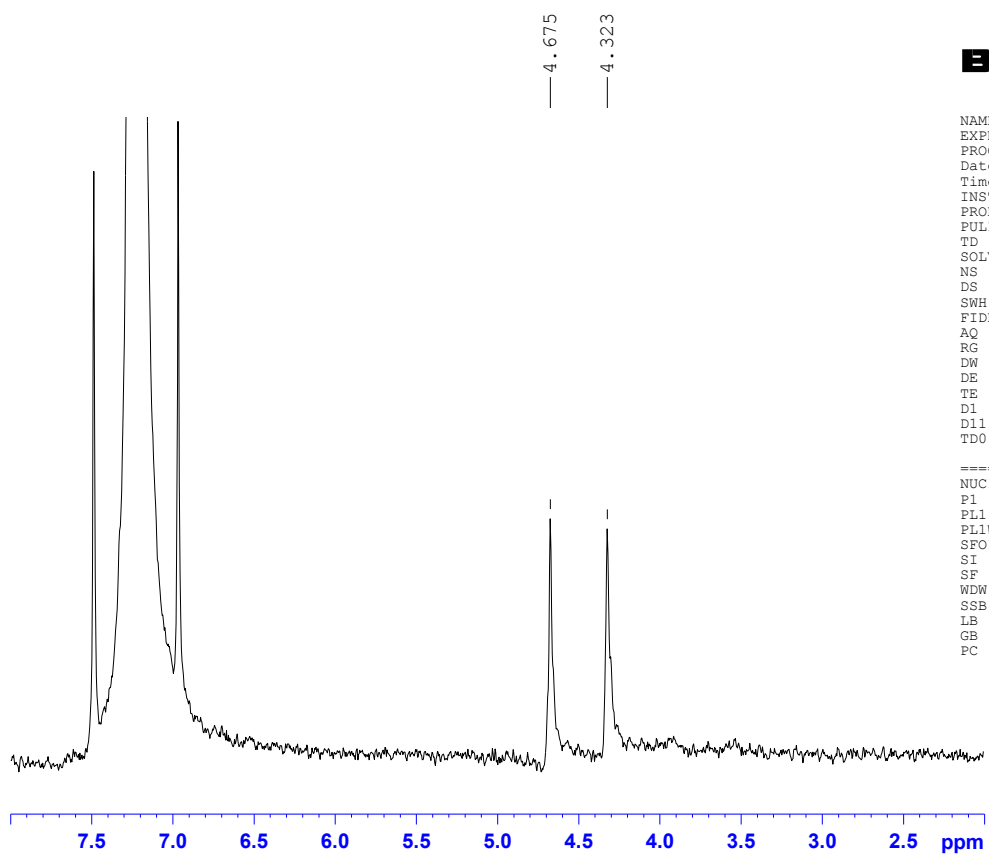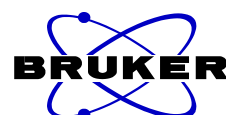

```
NAME      kh101-prim SO
EXPNO     12
PROCNO    1
Date_     20120626
Time      17.30
INSTRUM   spect
PROBHD    5 mm PABBO BB-
PULPROG   zg2h
TD        65536
SOLVENT   CDC13
NS        16
DS        0
SWH       8223.685 Hz
FIDRES    0.125483 Hz
AQ        3.9846387 sec
RG        1
DW        60.800 usec
DE        6.50 usec
TE        300.0 K
D1        1.00000000 sec
D11       0.03000000 sec
TD0       1
```

```
===== CHANNEL f1 =====
NUC1      2H
P1        280.00 usec
PL1       -6.00 dB
PL1W      3.50999999 W
SF01      61.4226981 MHz
SI        32768
SF        61.4223910 MHz
WDW       EM
SSB       0
LB        0.30 Hz
GB        0
PC        1.00
```

### S39 <sup>13</sup>C -ethylene glycol sulfite-d2

kh101-prim 30

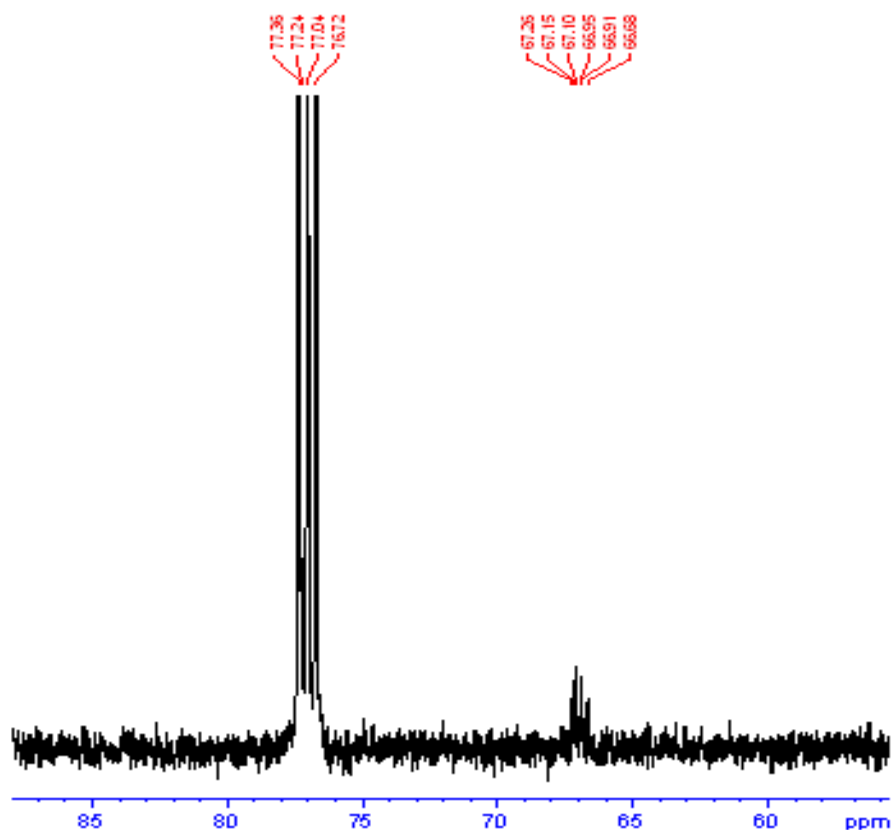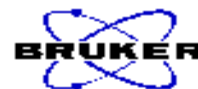

NAME kh101-prim 30  
EXPNO 1  
PROCNO 1  
Date\_ 20120626  
Time 7.07  
INSTRUM spect  
PROBHD 5 mm PA550 SS-  
PULPROG zgpg30  
TD 65536  
SOLVENT CDCl3  
NS 512  
DS 4  
SWH 24038.461 Hz  
FIDRES 0.366798 Hz  
AQ 1.3631988 sec  
RG 250  
DW 20.800 usec  
DE 10.04 usec  
TE 300.0 K  
D1 2.0000000 sec  
D11 0.0000000 sec  
TD0 1

----- CHANNEL f1 -----  
NUC1 13C  
P1 7.80 usec  
PL1 -3.00 dB  
PL1W 82.88334991 W  
SFO1 100.6228298 MHz

----- CHANNEL f2 -----  
CFOPRG2 waltz16  
NUC2 1H  
PCPD2 80.00 usec  
PL2 -4.00 dB  
PL12 14.24 dB  
PL13 14.24 dB  
PL2W 24.60733604 W  
PL12W 0.36903290 W  
PL13W 0.36903290 W  
SFO2 400.1318005 MHz  
SI 65536  
SF 100.6127690 MHz  
WDW EM  
SSB 0  
LB 1.00 Hz  
GB 0  
PC 1.40

### S40 <sup>1</sup>H-ethylene glycol sulfate-d2

kh101-prim-SO2

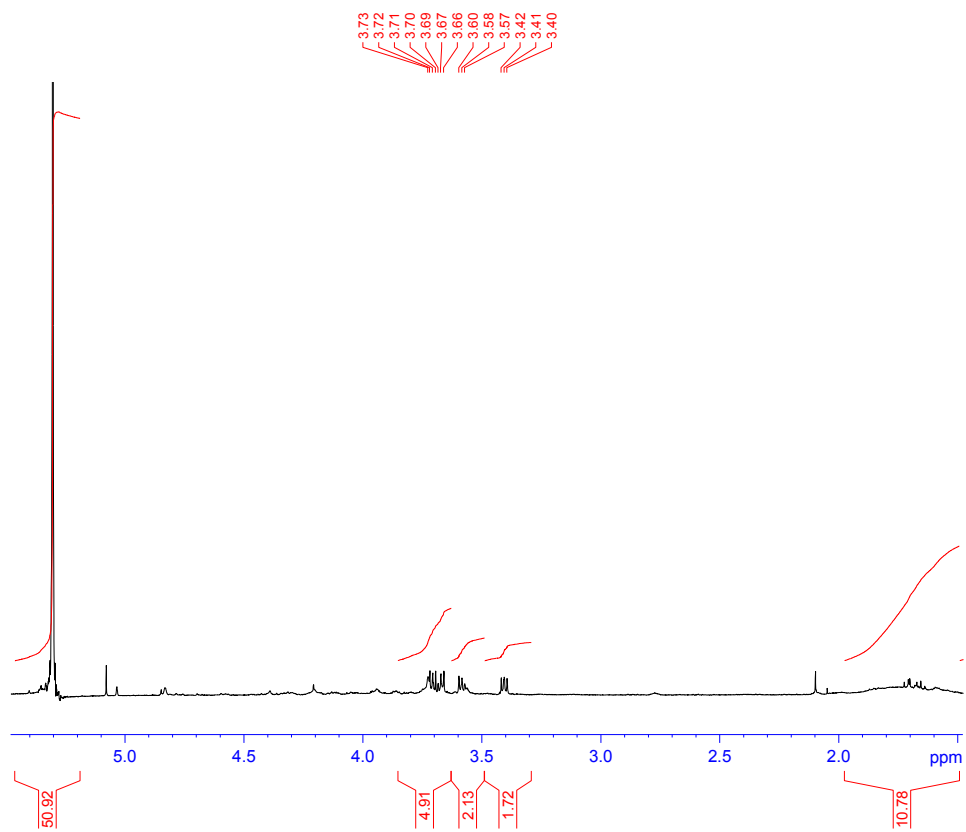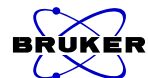

NAME kh101-prim-SO2  
EXPNO 10  
PROCNO 1  
Date\_ 20120626  
Time 16.42  
INSTRUM spect  
PROBHD 5 mm PABBO BB-  
PULPROG zg30  
TD 65536  
SOLVENT CDCl3  
NS 16  
DS 0  
SWH 8223.685 Hz  
FIDRES 0.125483 Hz  
AQ 3.9846387 sec  
RG 203  
DW 60.800 usec  
DE 16.92 usec  
TE 300.0 K  
D1 1.00000000 sec  
TDO 1

===== CHANNEL f1 =====  
NUC1 1H  
P1 9.80 usec  
PL1 -4.00 dB  
PL1W 24.60733604 W  
SFO1 400.1324710 MHz  
SI 32768  
SF 400.1300082 MHz  
WDW EM  
SSB 0  
LB 0.30 Hz  
GB 0  
PC 1.40



### S41 <sup>2</sup>H-ethylene glycol sulfate-d2

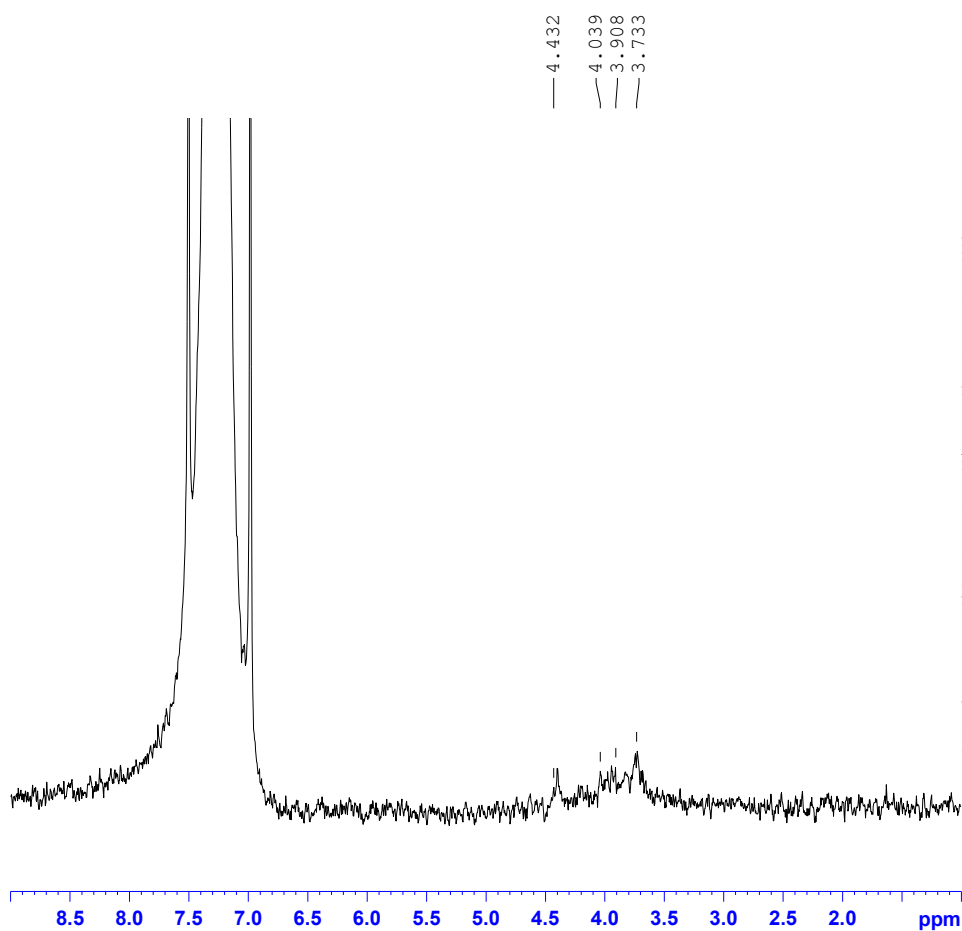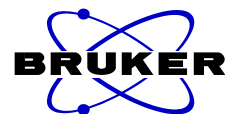

```
NAME kh101-prim-SO2
EXPNO 21
PROCNO 1
Date_ 20120725
Time_ 13.23
INSTRUM spect
PROBHD 5 mm PABBO BB-
PULPROG zg2h
TD 65536
SOLVENT CDC13
NS 32
DS 0
SWH 8223.685 Hz
FIDRES 0.125483 Hz
AQ 3.9846387 sec
RG 1
DW 60.800 usec
DE 6.50 usec
TE 300.0 K
D1 1.0000000 sec
D11 0.0300000 sec
TDO 1
```

```
===== CHANNEL f1 =====
NUC1 2H
P1 280.00 usec
PL1 -6.00 dB
PL1W 3.50999999 W
SFO1 61.4226981 MHz
SI 32768
SF 61.4223910 MHz
WDW EM
SSB 0
LE 0.30 Hz
GB 0
PC 1.00
```

### S42 <sup>13</sup>C-ethylene glycol sulfate-d2

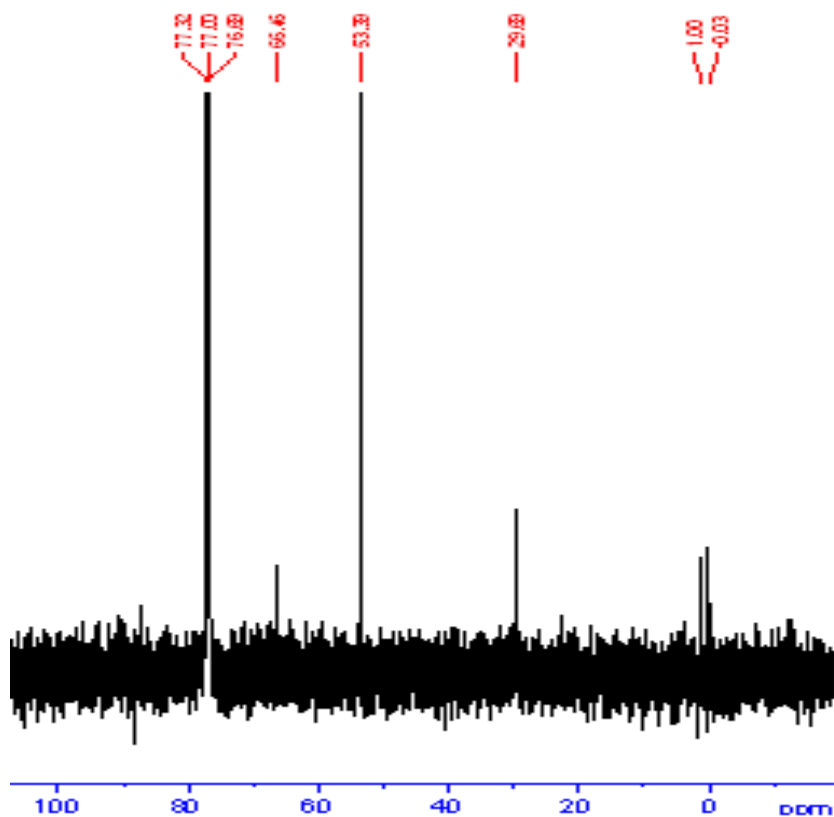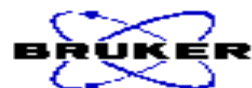

NAME kh 10 1-pm S02  
EXPNO 10  
PROCNO 1  
Date\_ 20120803  
Time 13.12  
INSTRUM spect  
PROBHD 5 mm PA5BOB5-  
PULPROG zgpg30  
TD 65536  
SOLVENT CDCl3  
NS 1024  
DS 4  
SWH 24038.461 Hz  
FIDRES 0.365798 Hz  
AQ 1.3631588 sec  
RG 2050  
DWF 20.800 usec  
DE 10.04 usec  
TE 300.0 K  
D1 2.0000000 sec  
D11 0.0300000 sec  
TD0 1

----- CHANNEL f1 -----  
NUC1 13C  
P1 7.00 usec  
PL1 -3.00 dB  
PL1W 82.86334561 W  
SFO1 100.6228258 MHz

----- CHANNEL f2 -----  
CDEPRG2 waltz16  
NUC2 1H  
PCPD2 80.00 usec  
PL2 -4.00 dB  
PL2 1.424 dB  
PL3 1.424 dB  
PL2W 24.60733604 W  
PL3W 0.36903250 W  
SFO2 400.1318000 MHz  
SE 6.6536  
SF 100.6127650 MHz  
WDW EM  
SSB 0  
LB 1.00 Hz  
GB 0  
PC 1.40

### S43 <sup>1</sup>H- 2,3-butanediol sulfite-d<sub>2</sub>

kh101-sec SO

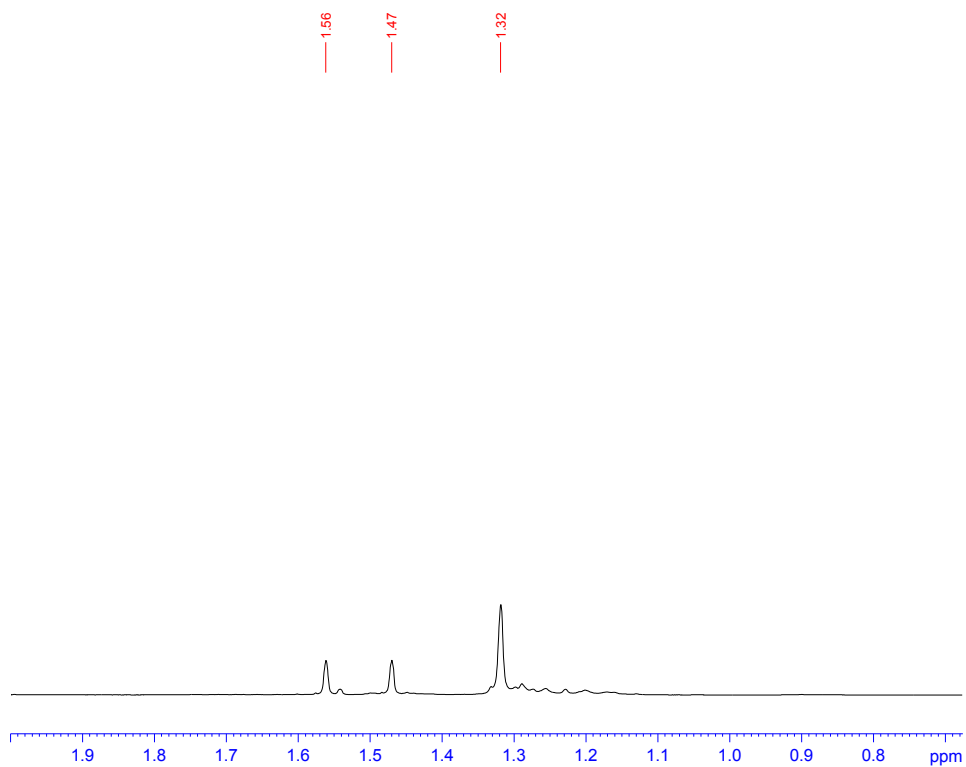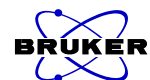

```
NAME kh101-sec SO
EXPNO 12
PROCNO 1
Date_ 20120626
Time 17.52
INSTRUM spect
PROBHD 5 mm PABBO BB-
PULPROG zg30
TD 65536
SOLVENT CDCl3
NS 16
DS 0
SWH 8223.685 Hz
FIDRES 0.125483 Hz
AQ 3.9846387 sec
RG 32
DW 60.800 usec
DE 16.92 usec
TE 300.0 K
D1 1.00000000 sec
TD0 1
```

```
===== CHANNEL f1 =====
NUC1 1H
P1 9.80 usec
PL1 -4.00 dB
PL1W 24.60733604 W
SFO1 400.1324710 MHz
SI 32768
SF 400.1300000 MHz
WDW EM
SSB 0
LB 0.30 Hz
GB 0
PC 1.40
```

S44  $^2\text{H}$ - 2,3-butanediol sulfite- $\text{d}_2$

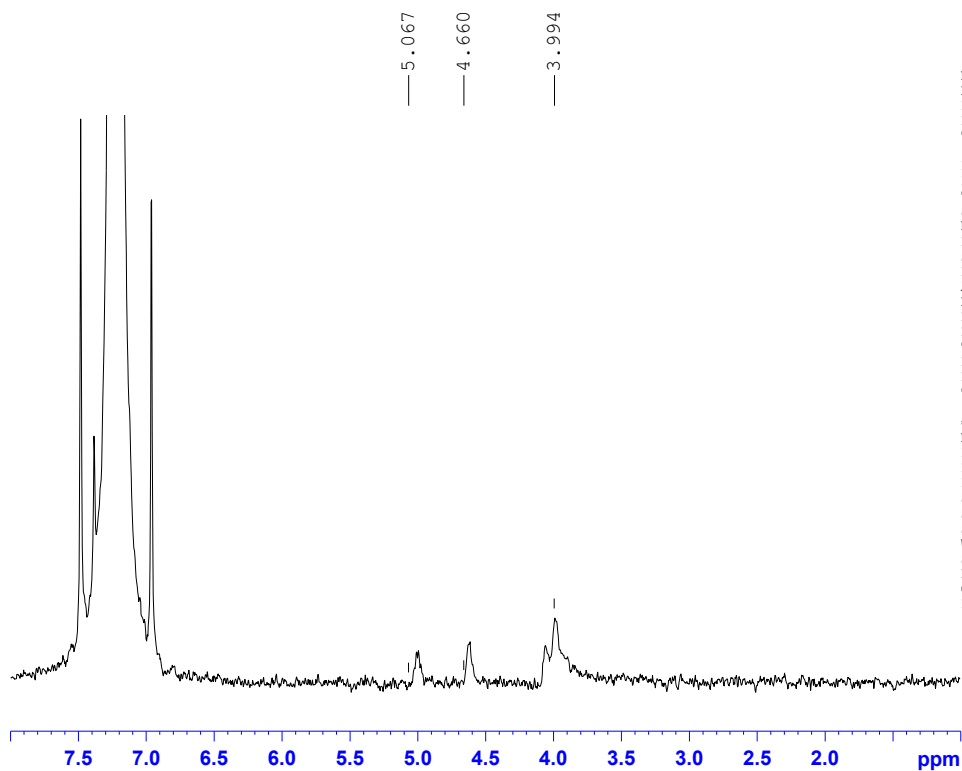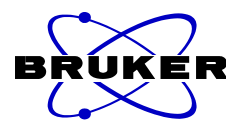

```
NAME kh101-sec SO
EXPNO 13
PROCNO 1
Date_ 20120626
Time_ 17.54
INSTRUM spect
PROBHD 5 mm PABBO BB-
PULPROG zgpg30
TD 65536
SOLVENT CDCl3
NS 16
DS 0
SWH 8223.685 Hz
FIDRES 0.125483 Hz
AQ 3.9846387 sec
RG 1
DW 60.800 usec
DE 6.50 usec
TE 300.0 K
D1 1.00000000 sec
D11 0.03000000 sec
TDO 1
```

```
===== CHANNEL f1 =====
NUC1 2H
P1 280.00 usec
PL1 -6.00 dB
PL1W 3.50999999 W
SFO1 61.4226981 MHz
SI 32768
SF 61.4223910 MHz
WDW EM
SSB 0
LB 0.30 Hz
GB 0
PC 1.00
```

S45  $^{13}\text{C}$ - 2,3-butanediol sulfite- $\text{d}_2$

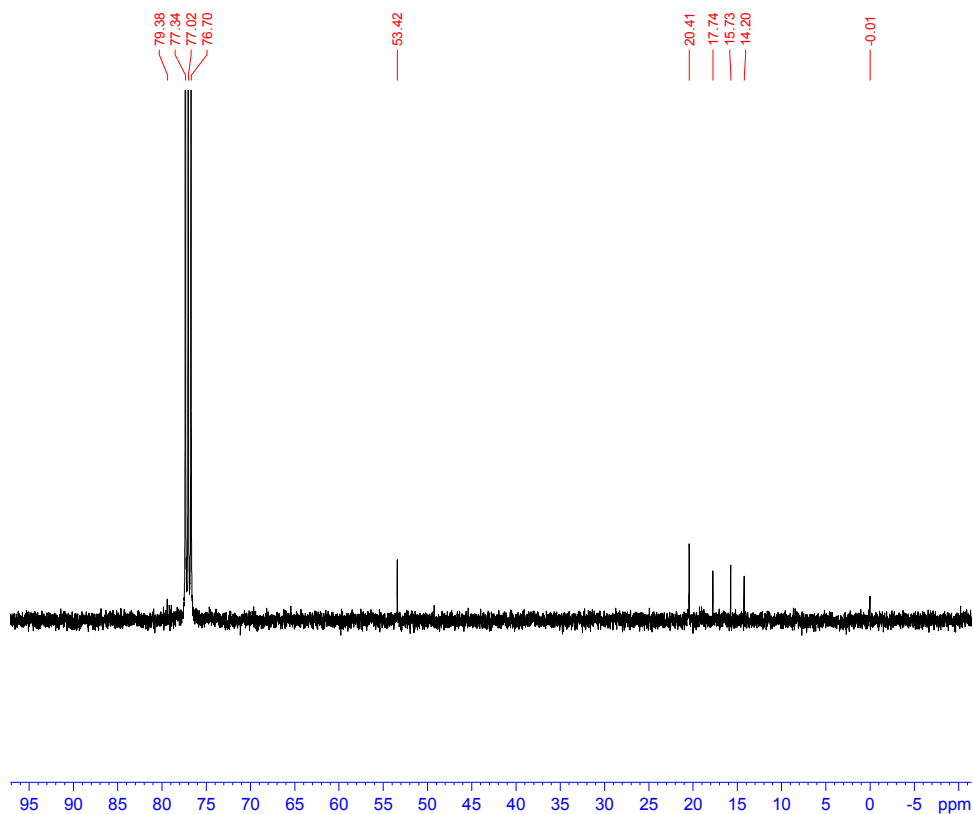

NAME kh101-sec SO  
EXPNO 20  
PROCNO 1  
Date\_ 20120626  
Time\_ 20.07  
INSTRUM spect  
PROBHD 5 mm PABBO BB-  
PULPROG zgpg30  
TD 65536  
SOLVENT CDCl3  
NS 512  
DS 4  
SWH 24038.461 Hz  
FIDRES 0.366798 Hz  
AQ 1.3631988 sec  
RG 2050  
DW 20.800 usec  
DE 10.04 usec  
TE 300.0 K  
D1 2.0000000 sec  
D11 0.0300000 sec  
TD0 1

===== CHANNEL f1 =====  
NUC1  $^{13}\text{C}$   
P1 7.80 usec  
PL1 -3.60 dB  
PL1W 82.8634991 W  
SFO1 100.6228298 MHz

===== CHANNEL f2 =====  
CPDPRG2 waltz16  
NUC2  $^1\text{H}$   
PCPD2 80.00 usec  
PL2 -4.00 dB  
PL12 14.24 dB  
PL13 14.24 dB  
PL2W 24.60733604 W  
PL12W 0.36903250 W  
PL13W 0.36903250 W  
SFO2 400.1315005 MHz  
SI 65536  
SF 100.6127690 MHz  
WDW EM  
SSB 0  
LB 1.00 Hz  
GB 0  
PC 1.40

**S46  $^2\text{H}$ - 2,3-butanediol sulfate- $\text{d}_2$**

sec so2

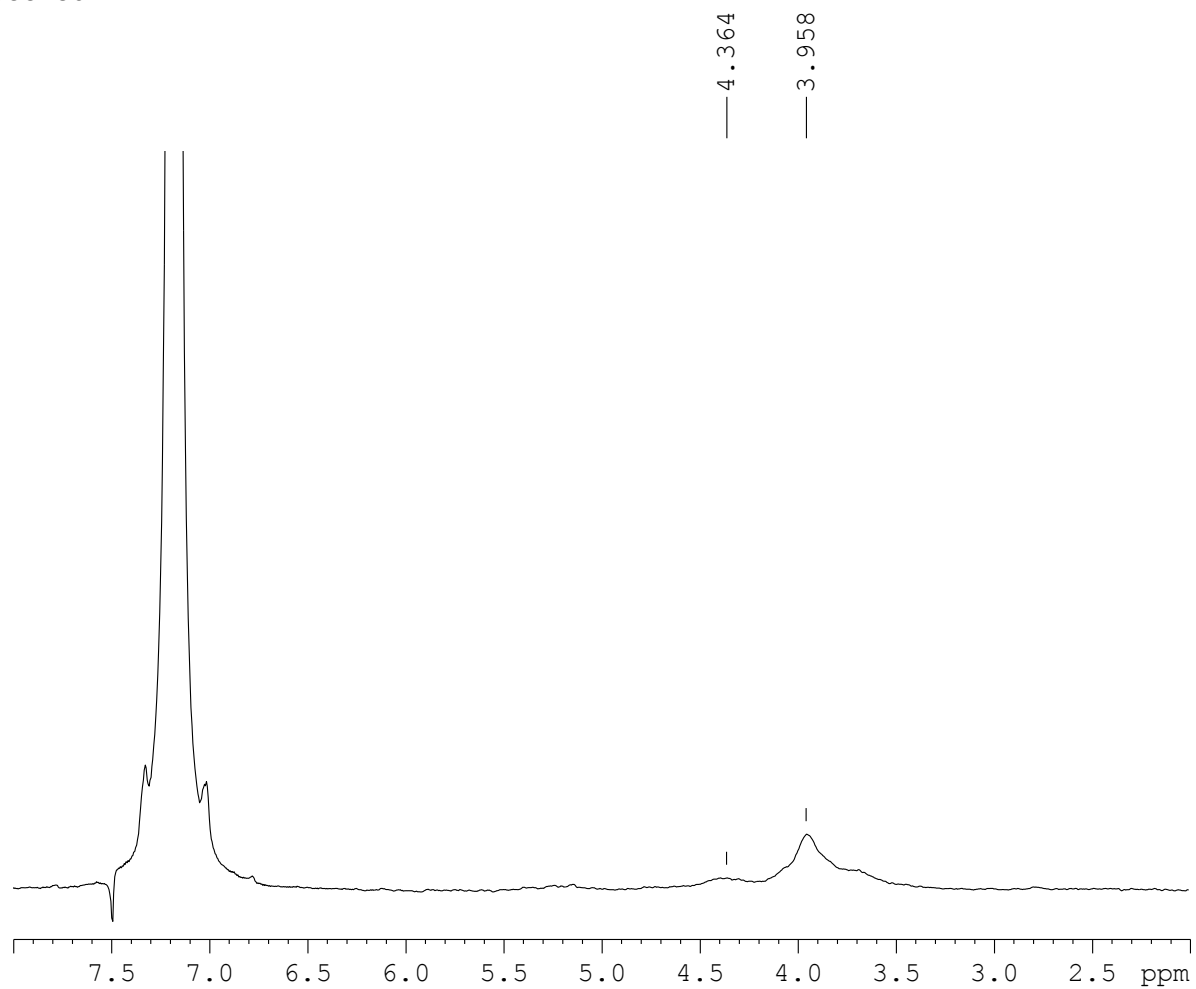

**S47  $^2\text{H}$  Cyclohexanediol sulfite d2**

cyc SO

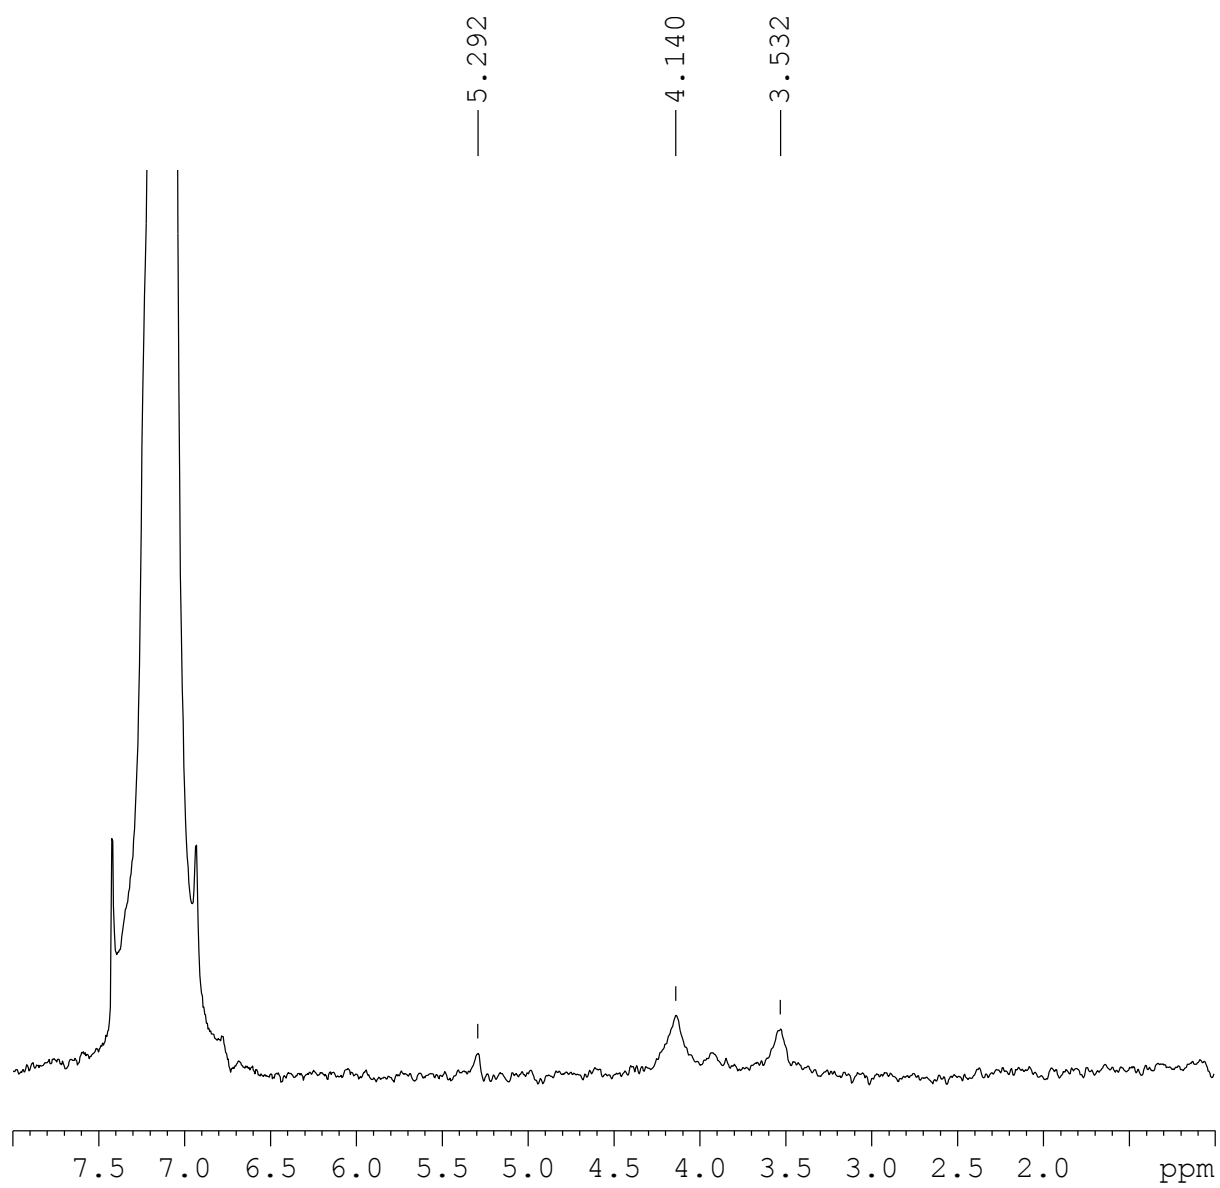

### S48 $^2\text{H}$ Cyclohexandiol sulfate- $\text{d}_2$

cyc so2

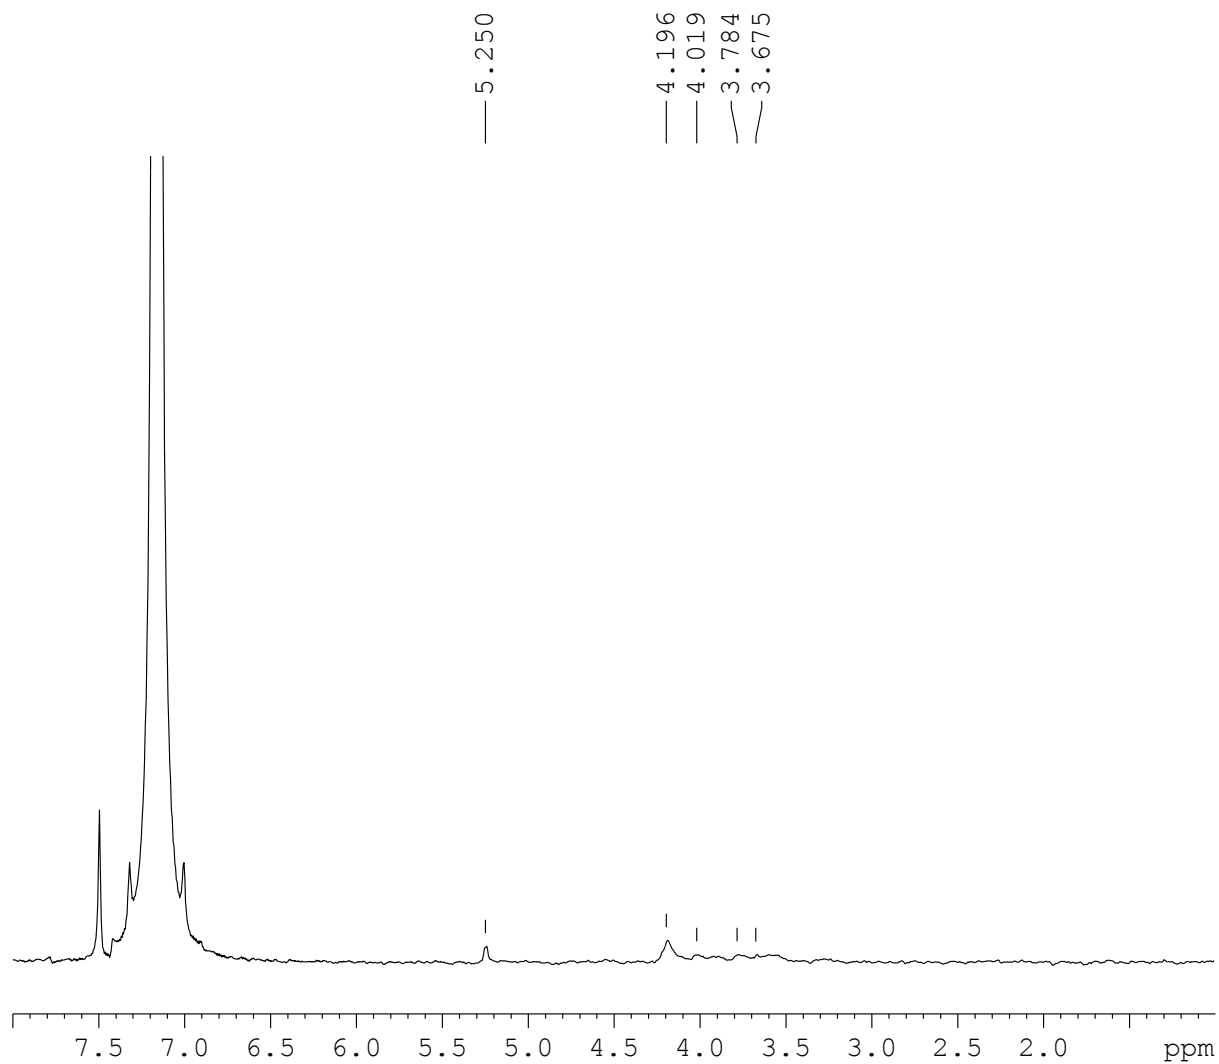



S49  $^2\text{H}$  ethylene glycol-d<sub>2</sub> reaction with  $\text{SOCl}_2$  in IL2

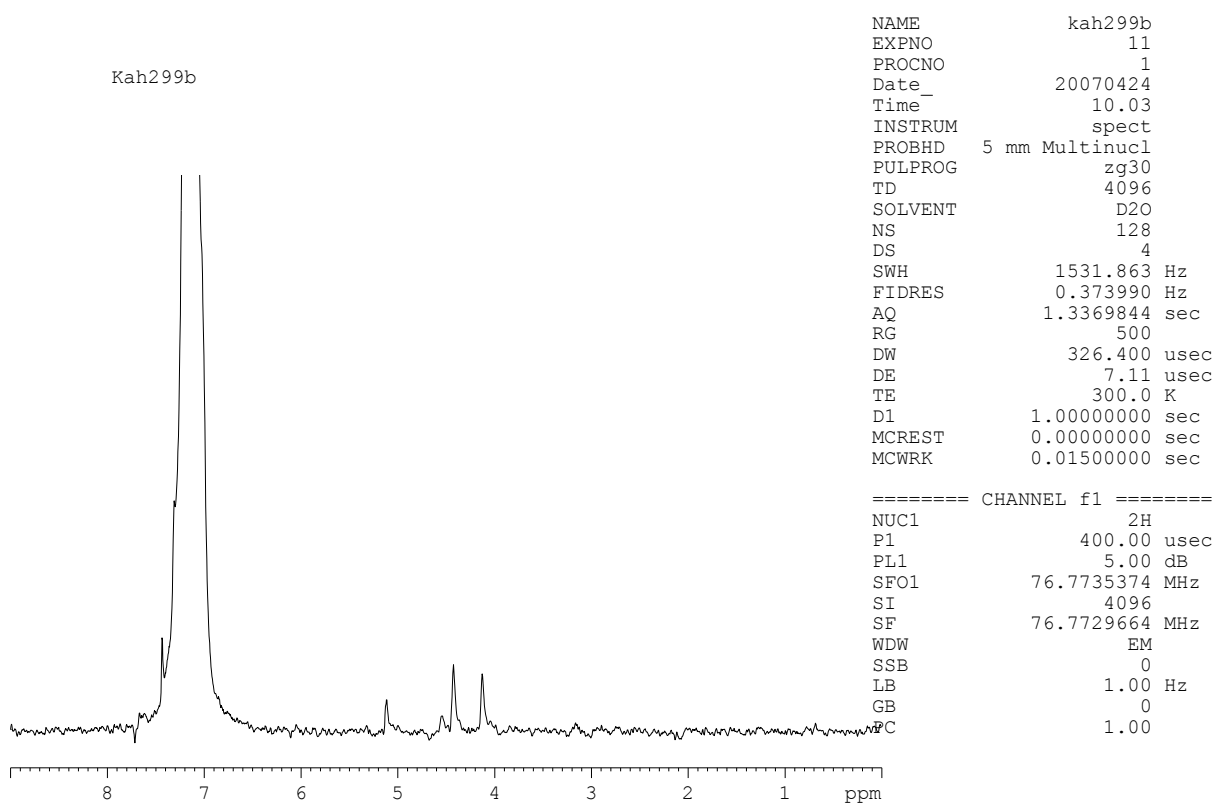

### S50 <sup>2</sup>H ethylene glycol-d2 reaction with SOCl<sub>2</sub> and base in IL2

kah314b

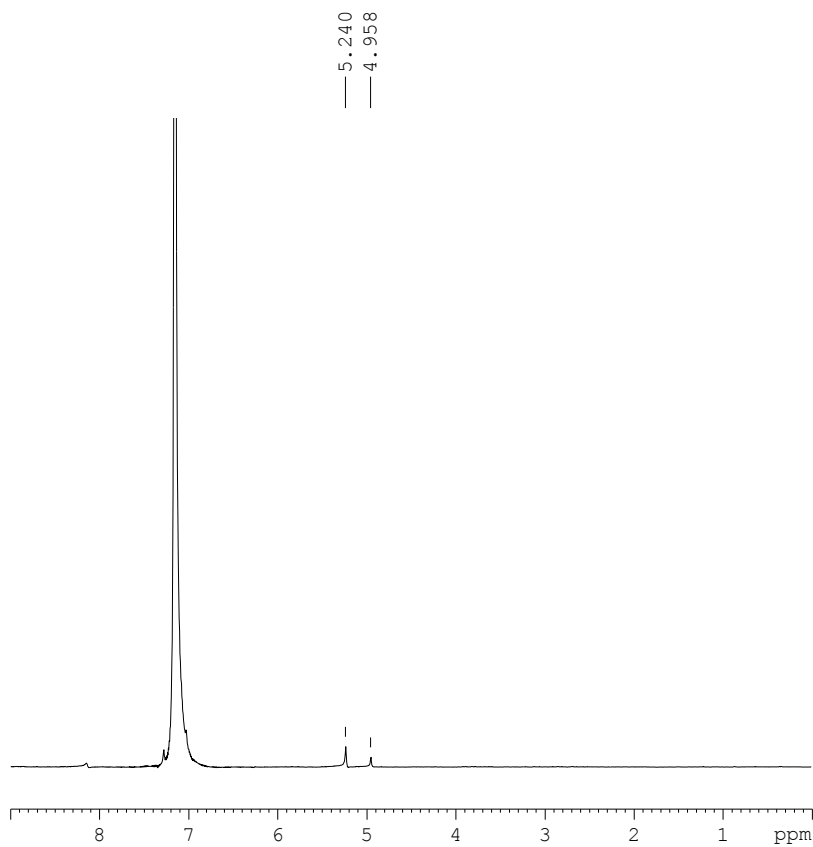

```
NAME          kah314b
EXPNO         11
PROCNO        1
Date_         20070503
Time_         10.29
INSTRUM       spect
PROBHD        5 mm TXI 13C Z
PULPROG       zg30
TD            4096
SOLVENT       C6D6
NS            128
DS            8
SWH           1531.863 Hz
FIDRES        0.373990 Hz
AQ            1.3369844 sec
RG            500
DW            326.400 usec
DE            7.11 usec
TE            300.0 K
D1            0.50000000 sec
MCREST        0.00000000 sec
MCWRK         0.01500000 sec
```

```
===== CHANNEL f1 =====
NUC1          2H
P1            400.00 usec
PL1           5.00 dB
SFO1          76.7735374 MHz
SI            4096
SF            76.7731569 MHz
WDW           EM
SSB           0
LB            1.00 Hz
GB            0
PC            1.00
```

S51  $^2\text{H}$  2,3-butanediol-d2 reaction with  $\text{SOCl}_2$  in IL1

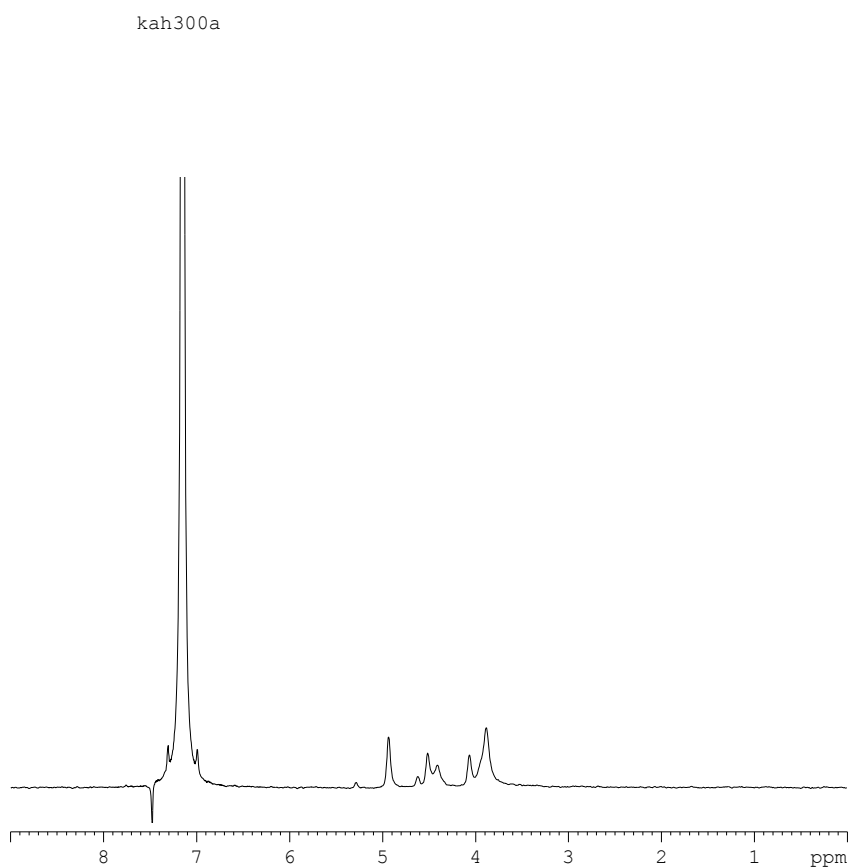

NAME kah300a  
EXPNO 11  
PROCNO 1  
Date\_ 20070424  
Time\_ 12.15  
INSTRUM spect  
PROBHD 5 mm Multinucl  
PULPROG zg30  
TD 4096  
SOLVENT D2O  
NS 128  
DS 4  
SWH 1531.863 Hz  
FIDRES 0.373990 Hz  
AQ 1.3369844 sec  
RG 500  
DW 326.400 usec  
DE 7.11 usec  
TE 300.0 K  
D1 1.00000000 sec  
MCREST 0.00000000 sec  
MCWRK 0.01500000 sec

==== CHANNEL f1 =====  
NUC1 2H  
P1 400.00 usec  
PL1 5.00 dB  
SFO1 76.7735374 MHz  
SI 4096  
SF 76.7729632 MHz  
WDW EM  
SSB 0  
LB 1.00 Hz  
GB 0  
PC 1.00

S52 <sup>2</sup>H 2,3-butanediol-d2 reaction with SOCl<sub>2</sub> and base in IL1

kah311a

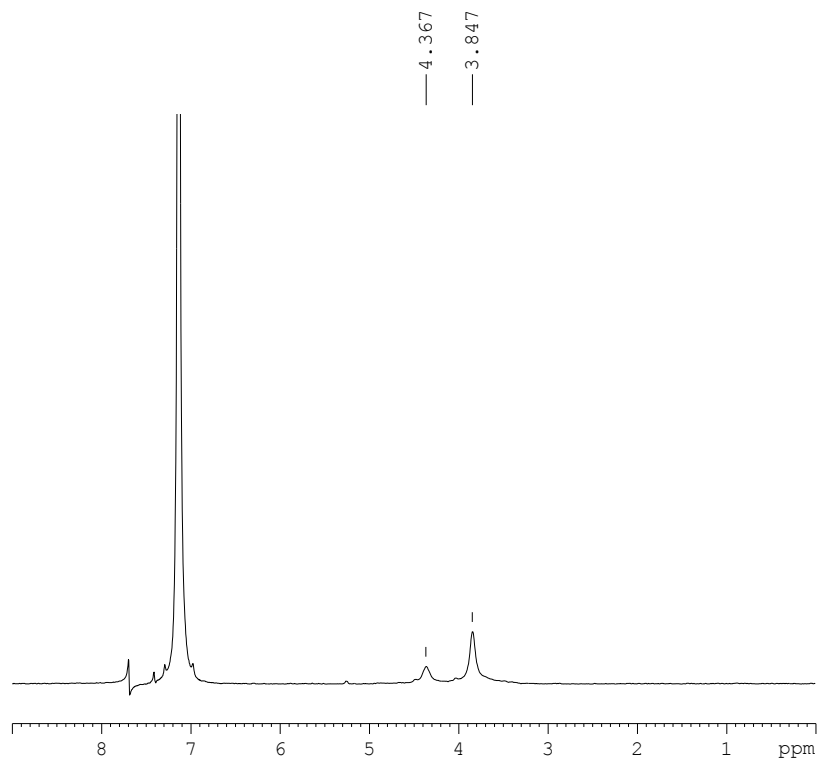

NAME KAH311a  
EXPNO 21  
PROCNO 1  
Date\_ 20070504  
Time\_ 18.04  
INSTRUM spect  
PROBHD 5 mm TXI 13C Z  
PULPROG zg30  
TD 4096  
SOLVENT C6D6  
NS 128  
DS 8  
SWH 1531.863 Hz  
FIDRES 0.373990 Hz  
AQ 1.3369844 sec  
RG 500  
DW 326.400 usec  
DE 7.11 usec  
TE 300.0 K  
D1 0.50000000 sec  
MCREST 0.00000000 sec  
MCWRK 0.01500000 sec

===== CHANNEL f1 =====  
NUC1 2H  
P1 400.00 usec  
PL1 5.00 dB  
SFO1 76.7735374 MHz  
SI 4096  
SF 76.7729682 MHz  
WDW EM  
SSB 0  
LB 1.00 Hz  
GB 0  
PC 1.00

### S53 $^2\text{H}$ pinacol-d6 reaction with $\text{SOCl}_2$ in IL1

kah301a

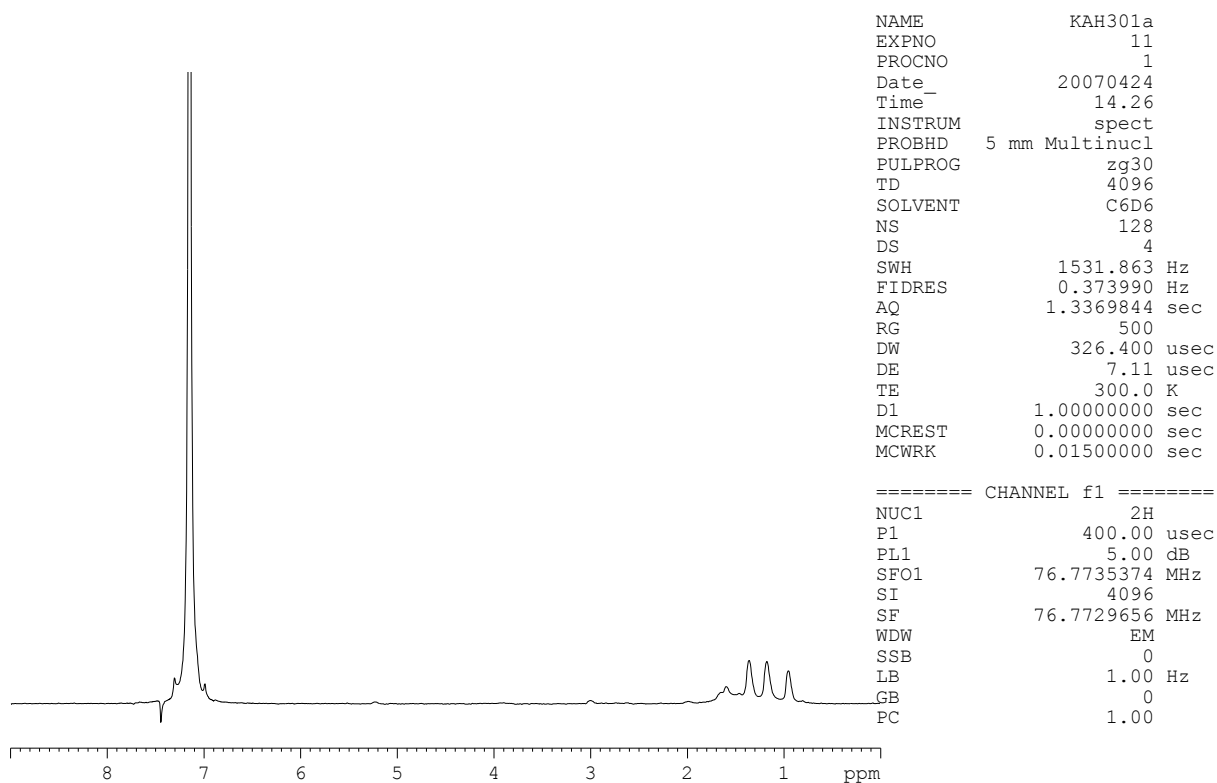

S54 <sup>2</sup>H pinacol-d6 reaction with SOCl<sub>2</sub> and base in IL1

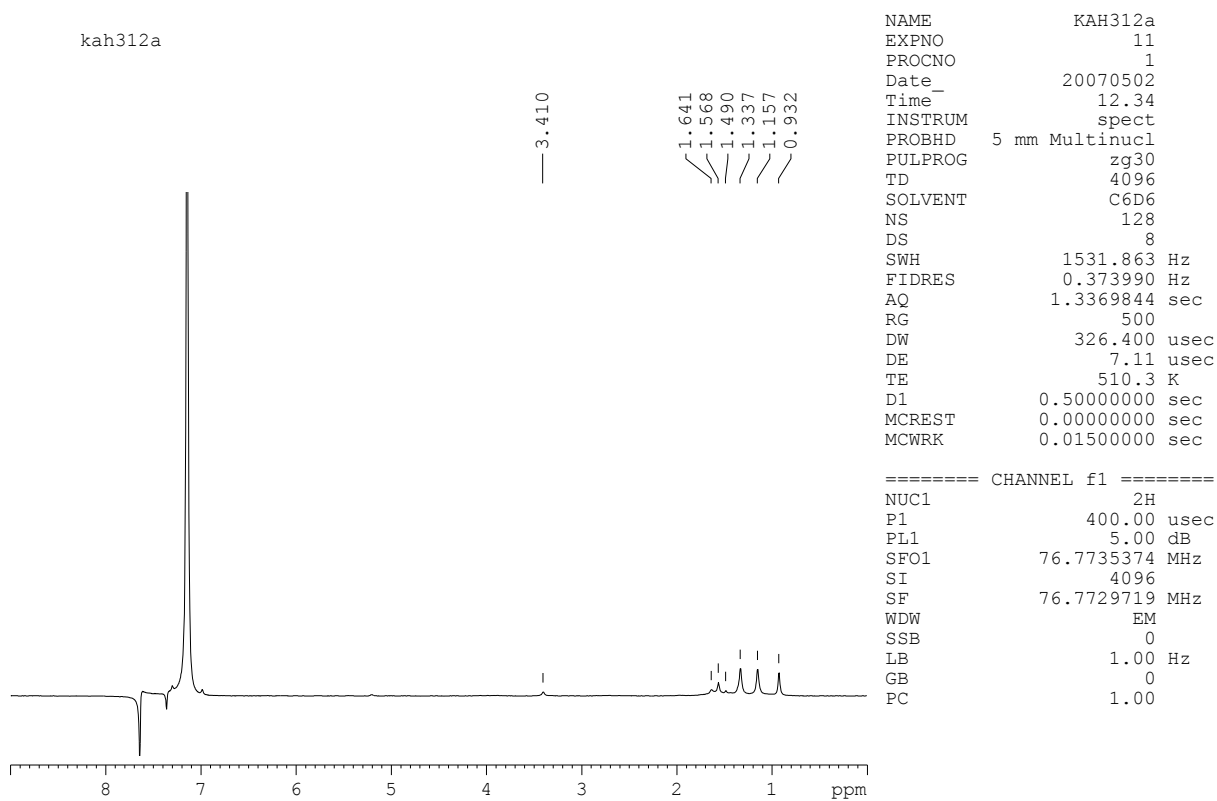

S55  $^2\text{H}$  1,2-cyclohexanediol-d2 reaction with  $\text{SOCl}_2$  in  $\text{IL2}$

kah306a

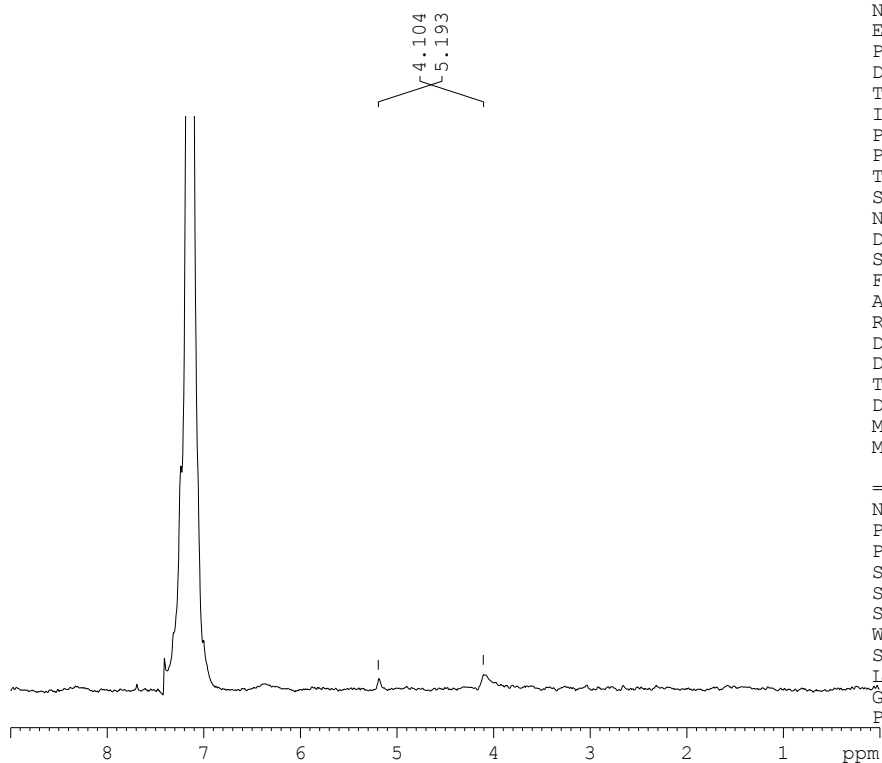

```
NAME          kah306a
EXPNO         11
PROCNO        1
Date_         20070425
Time_         15.39
INSTRUM       spect
PROBHD        5 mm Multinucl
PULPROG       zg30
TD            4096
SOLVENT       D2O
NS            128
DS            4
SWH           1531.863 Hz
FIDRES        0.373990 Hz
AQ            1.3369844 sec
RG            500
DW            326.400 usec
DE            7.11 usec
TE            300.0 K
D1            1.00000000 sec
MCREST        0.00000000 sec
MCWRK         0.01500000 sec
```

```
===== CHANNEL f1 =====
NUC1          2H
P1            400.00 usec
PL1           5.00 dB
SFO1          76.7735374 MHz
SI            4096
SF            76.7729683 MHz
WDW           EM
SSB           0
LB            1.00 Hz
GB            0
PC            1.00
```

S56  $^2\text{H}$  1,2-cyclohexanediol-d2 reaction with  $\text{SOCl}_2$  and base in IL1

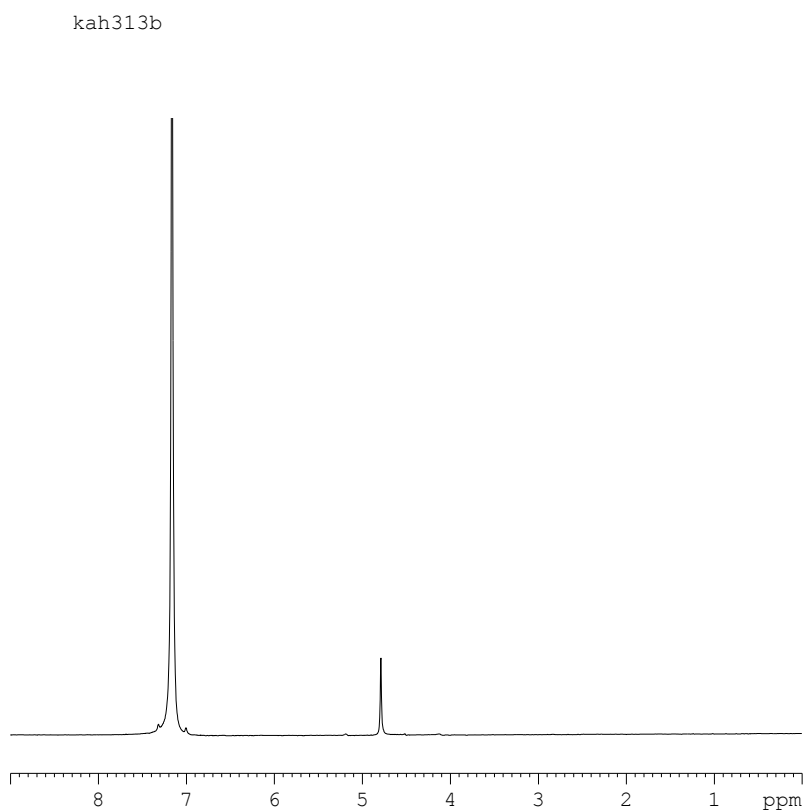

NAME KAH313b  
EXPNO 11  
PROCNO 1  
Date\_ 20070502  
Time\_ 14.10  
INSTRUM spect  
PROBHD 5 mm Multinucl  
PULPROG zg30  
TD 4096  
SOLVENT C6D6  
NS 128  
DS 8  
SWH 1531.863 Hz  
FIDRES 0.373990 Hz  
AQ 1.3369844 sec  
RG 500  
DW 326.400 usec  
DE 7.11 usec  
TE 510.3 K  
D1 0.50000000 sec  
MCREST 0.00000000 sec  
MCWRK 0.01500000 sec

==== CHANNEL f1 =====  
NUC1 2H  
P1 400.00 usec  
PL1 5.00 dB  
SFO1 76.7735374 MHz  
SI 4096  
SF 76.7731909 MHz  
WDW EM  
SSB 0  
LB 1.00 Hz  
GB 0  
PC 1.00



S57 T1 butanediol in NTf2

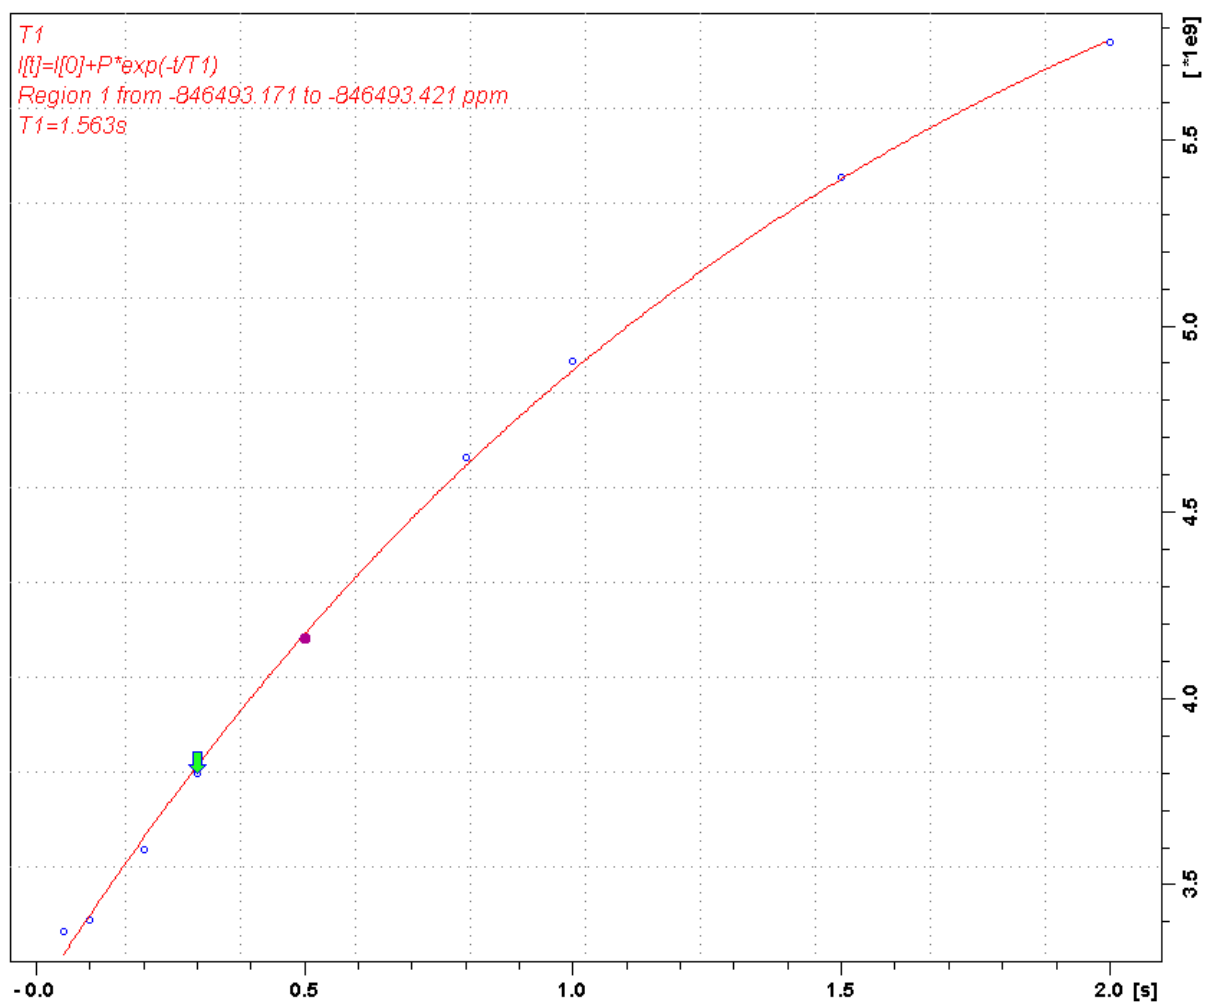

S58 T1 butanediol-d2 in FAP

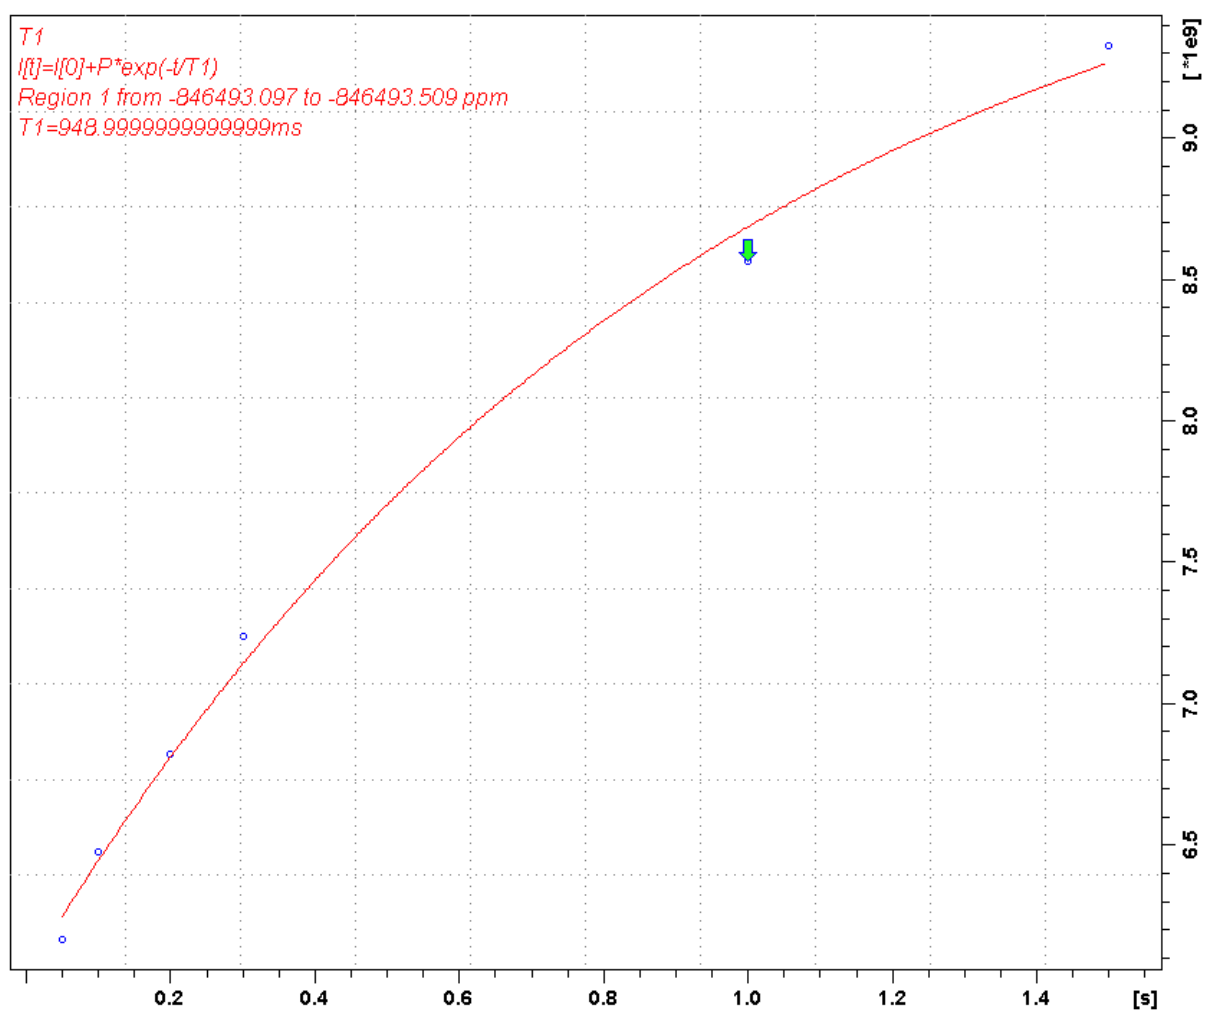

S59 T1 butanediol sulfite in NTf2

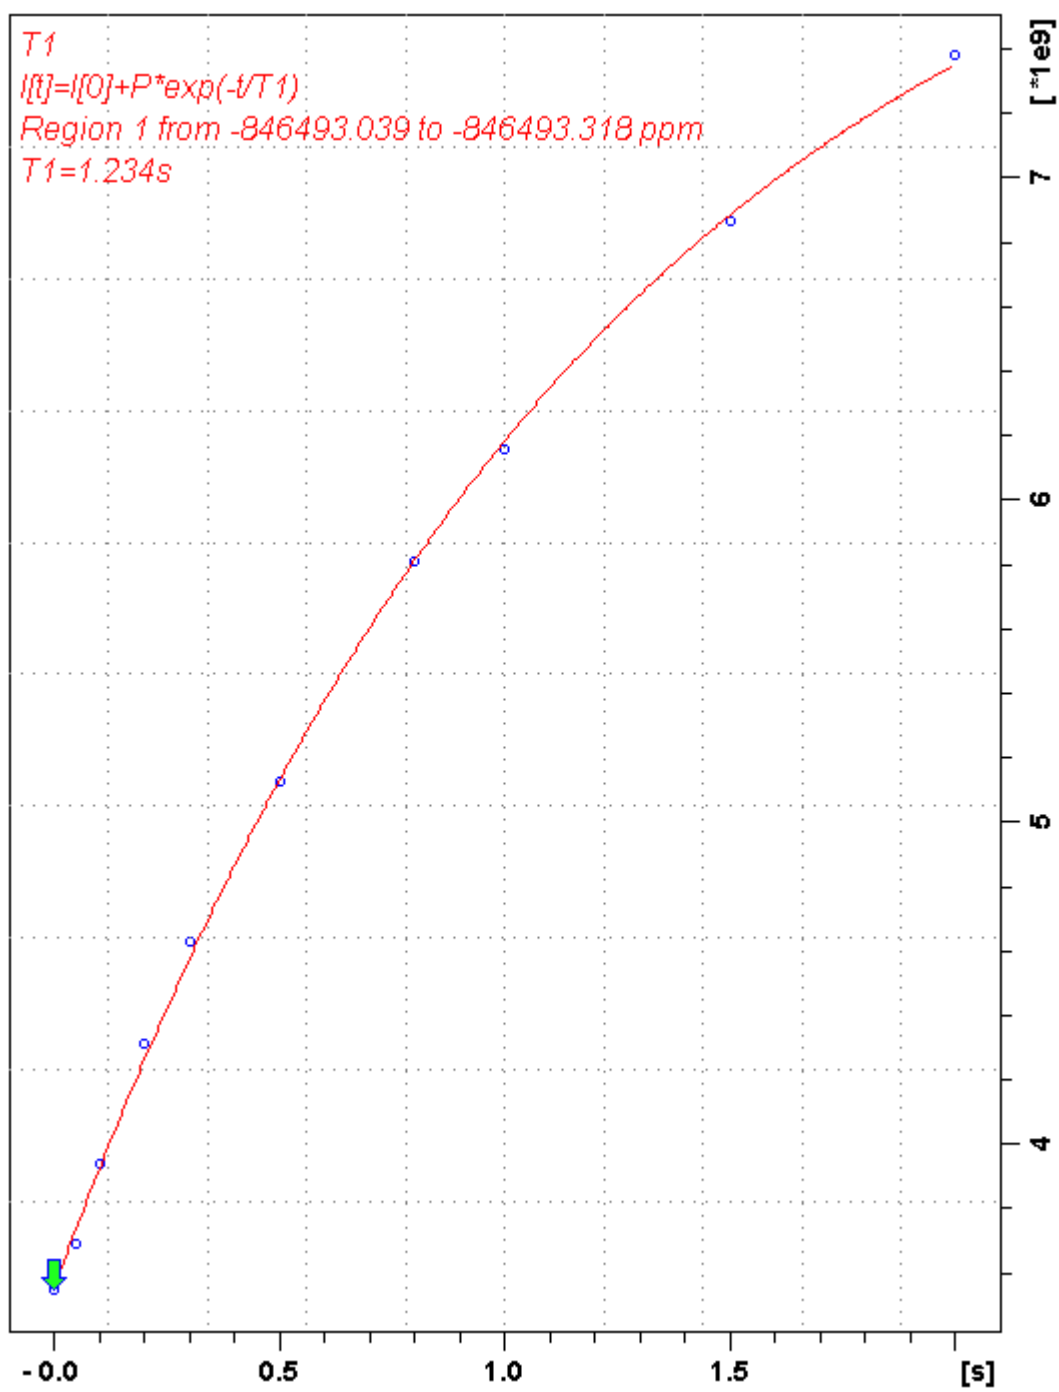

S60 T1 butanediol sulfite in DCM

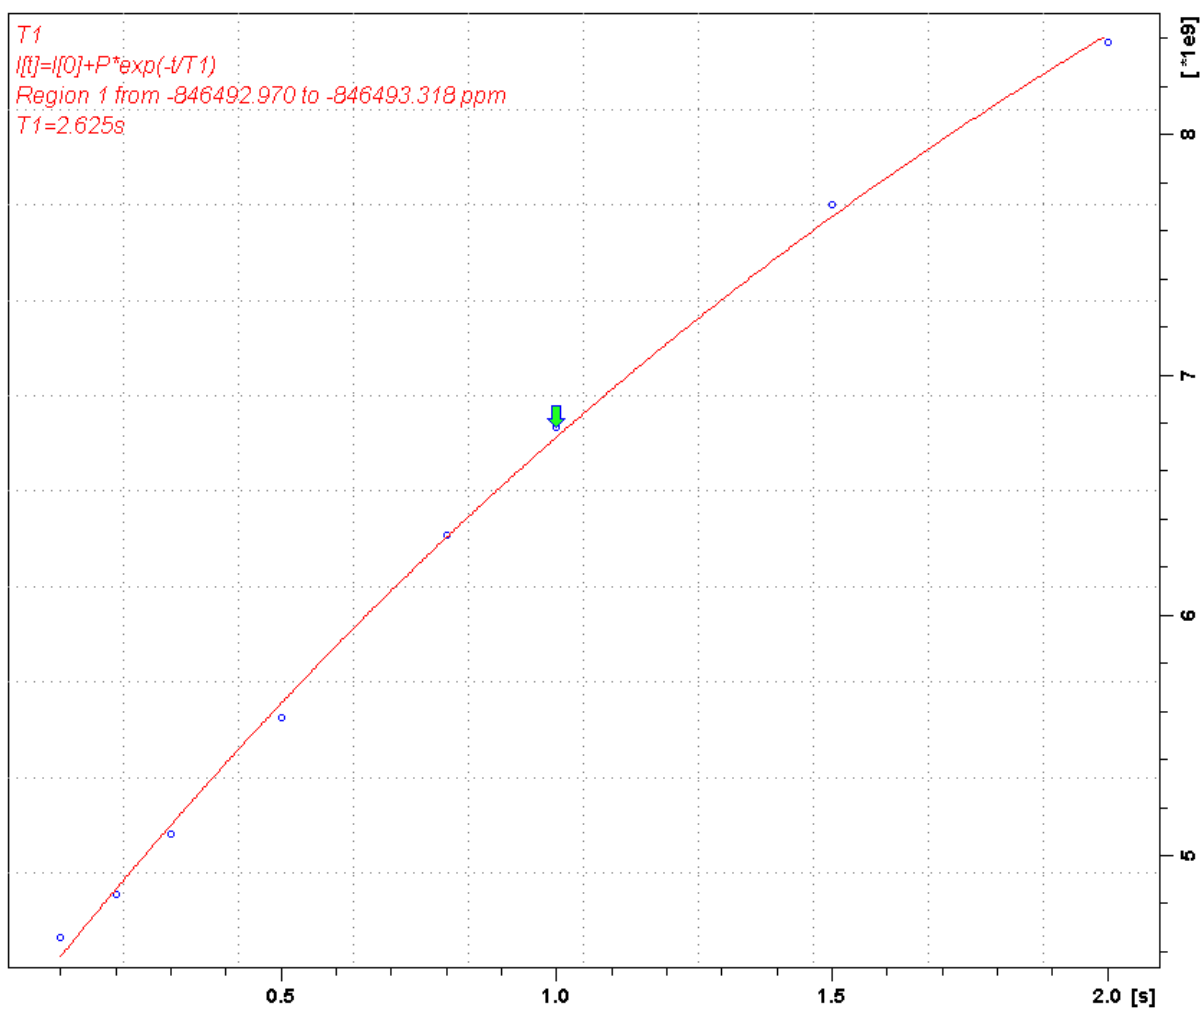

S61 T1 butanediol sulfite in FAP

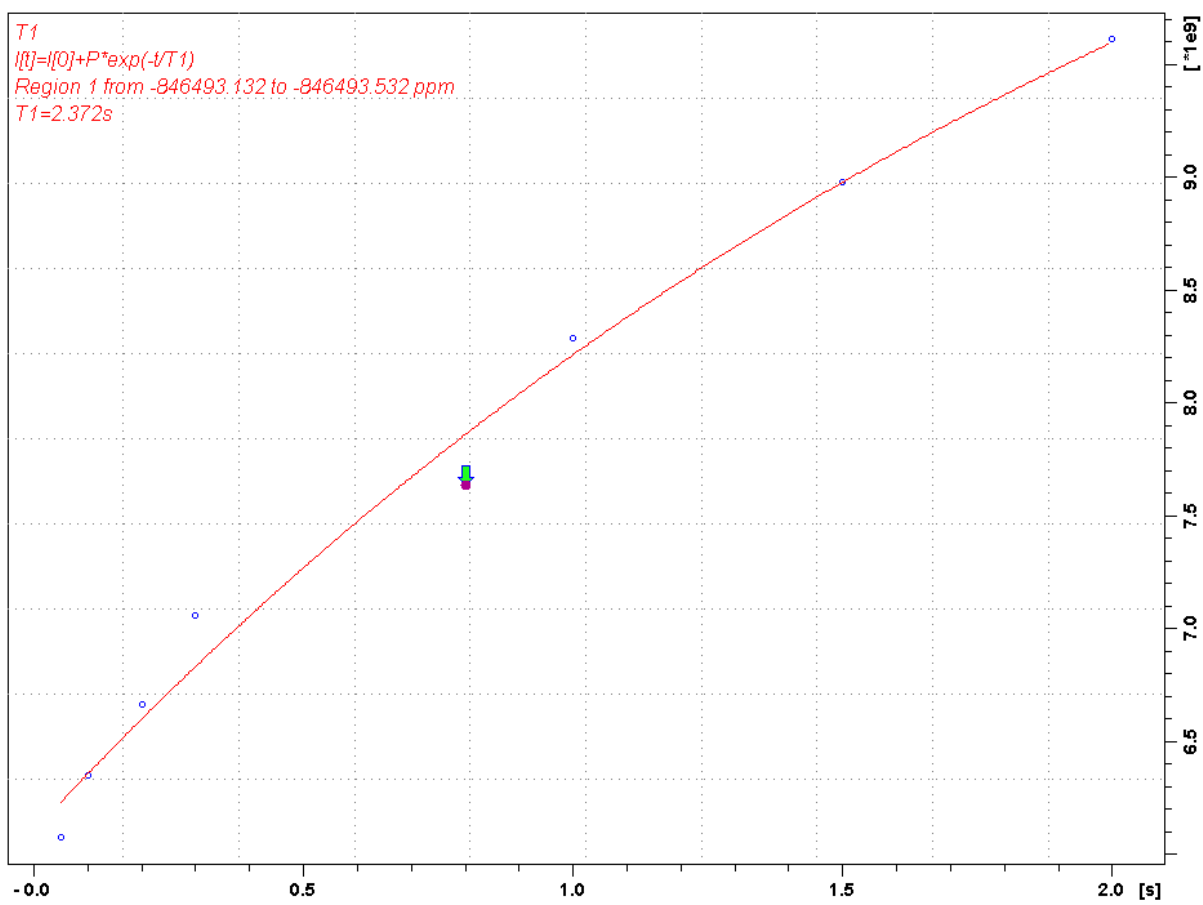

Supplement: c2nj40180k.pdf [file c2nj40180k.pdf]
